# Supplementary material for: Detection of Adulterated Naodesheng Tablet (Naodesheng Pian) via In-Depth Chemical Analysis and Subsequent Reconstruction of Its Pharmacopoeia Q-Markers
Source: MDPI journal article supplement (doi:10.3390/molecules29061392), 2024-03-20
Supplement: s1 [file s1]

*Suppl. 1 Identification of D-gluconic acid CAS 526-95-41*

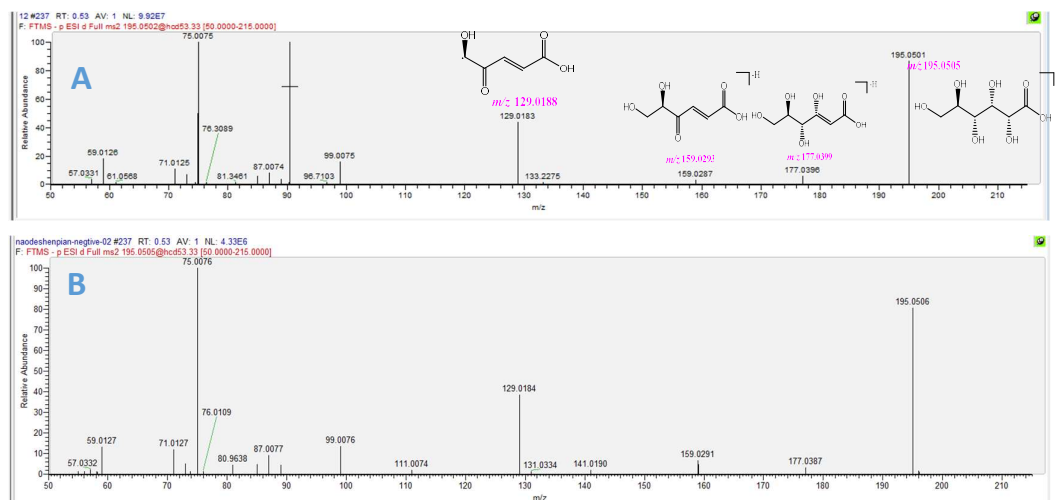

**Fig. S1.1** The main results of standard D-gluconic acid (CAS 526-95-4,  $C_6H_{12}O_7$ ) and its corresponding peak in the TIC diagram using UPLC-Q-Orbitrap-MS analysis. **(A)** The MS/MS fragments of standard D-gluconic acid. **(B)** The MS/MS spectra from chromatographic peak in the Naodeshengpian extract.

**Note:** The  $m/z$  values in purple are the calculated ones. The  $m/z$  calculation was based on the relative atomic masses of C (12.0000), H (1.007825), O (15.994915), and N (14.003074)<sup>[1]</sup>.

**Identification:** As seen in Fig. S1.1, the R.T. value, molecular ion peak, MS/MS spectra, and characteristic pears were highly similar. Thus, the chromatographic peak in the Naodeshengpian extract was identified as D-gluconic acid (CAS 526-95-4, C<sub>6</sub>H<sub>12</sub>O<sub>7</sub>).

Suppl. 2 Identification of citric acid CAS 77-92-9

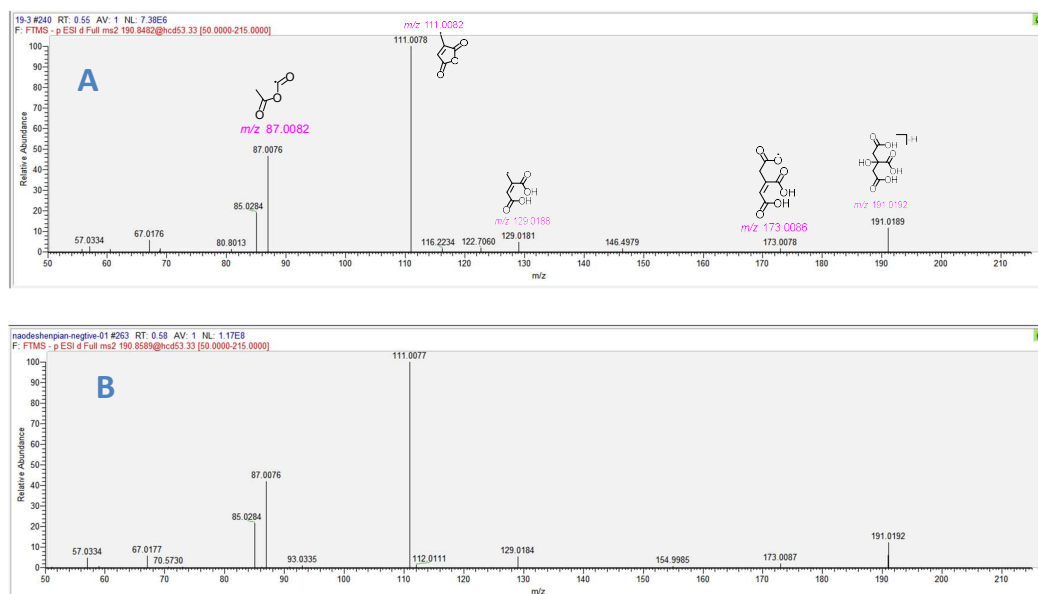

**Fig. S2.1** The main results of standard citric acid (CAS 77-92-9,  $C_6H_8O_7$ ) and its corresponding peak in the TIC diagram using UPLC-Q-Orbitrap-MS analysis. (A) The MS/MS fragments of standard citric acid. (B) The MS/MS spectra from chromatographic peak in the Naodeshengpian extract.

**Note:** The  $m/z$  values in purple are the calculated ones. The  $m/z$  calculation was based on the relative atomic masses of C (12.0000), H (1.007825), O (15.994915), and N (14.003074)<sup>[1]</sup>.

**Identification:** As seen in Fig. S2.1, the R.T. value, molecular ion peak, MS/MS spectra, and characteristic peaks were highly similar. Thus, the chromatographic peak in the Naodeshengpian extract was identified as citric acid (CAS 77-92-9,  $C_6H_8O_7$ ).

Suppl. 3 Identification of phenylalanine CAS 150-30-1

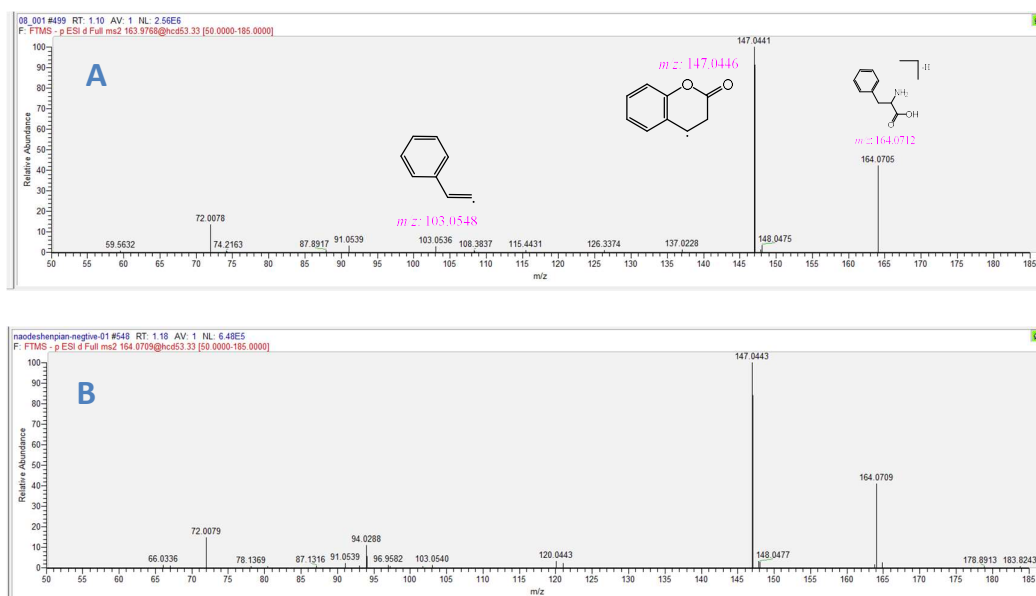

**Fig. S3.1** The main results of standard phenylalanine (CAS 150-30-1,  $C_9H_{11}NO_2$ ) and its corresponding peak in the TIC diagram using UPLC-Q-Orbitrap-MS analysis. **(A)** The MS/MS fragments of standard phenylalanine. **(B)** The MS/MS spectra from chromatographic peak in the Naodeshengpian extract.

**Note:** The  $m/z$  values in purple are the calculated ones. The  $m/z$  calculation was based on the relative atomic masses of C (12.0000), H (1.007825), O (15.994915), and N (14.003074)<sup>[1]</sup>.

**Identification:** As seen in Fig. S3.1, the R.T. value, molecular ion peak, MS/MS spectra, and characteristic peaks were highly similar. Thus, the chromatographic peak in the Naodeshengpian extract was identified as phenylalanine (CAS 150-30-1,  $C_9H_{11}NO_2$ ).

*Suppl. 4 Identification of protocatechuic acid CAS 99-50-3*

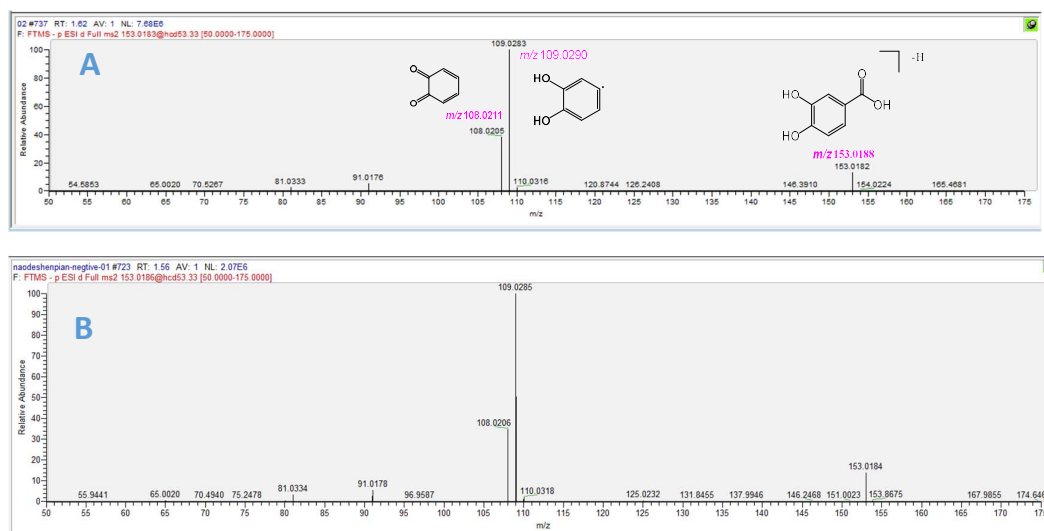

**Fig. S4.1** The main results of standard protocatechuic acid (CAS 99-50-3,  $C_7H_6O_4$ ) and its corresponding peak in the TIC diagram using UPLC-Q-Orbitrap-MS analysis. **(A)** The MS/MS fragments of standard protocatechuic acid. **(B)** The MS/MS spectra from chromatographic peak in the Naodeshengpian extract.

**Note:** The  $m/z$  values in purple are the calculated ones. The  $m/z$  calculation was based on the relative atomic masses of C (12.0000), H (1.007825), O (15.994915), and N (14.003074)<sup>[1]</sup>.

**Identification:** As seen in Fig. S4.1, the R.T. value, molecular ion peak, MS/MS spectra, and characteristic peaks were highly similar. Thus, the chromatographic peak in the Naodeshengpian extract was identified as protocatechuic acid (CAS 99-50-3,  $C_7H_6O_4$ ).



### Suppl. 5 Identification of L-tryptophan CAS 73-22-3

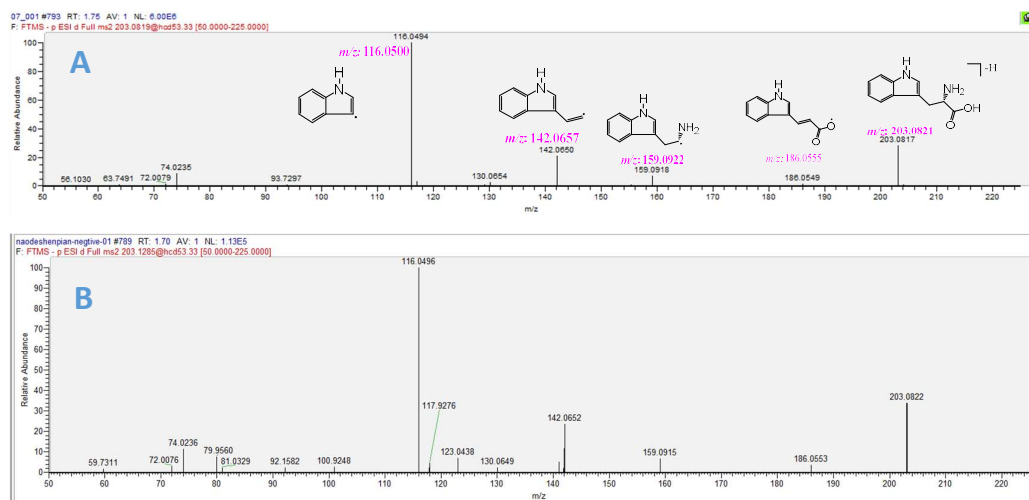

**Fig. S5.1** The main results of standard L-tryptophan(CAS 73-22-3,  $C_{11}H_{12}N_2O_2$ )and its corresponding peak in the TIC diagram using UPLC-Q-Orbitrap-MS analysis. **(A)** The MS/MS fragments of standard L-tryptophan. **(B)** The MS/MS spectra from chromatographic peak in the Naodeshengpian extract.

**Note:** The  $m/z$  values in purple are the calculated ones. The  $m/z$  calculation was based on the relative atomic masses of C (12.0000), H (1.007825), O (15.994915), and N (14.003074)<sup>[1]</sup>.

**Identification:** As seen in Fig. S5.1, the R.T. value, molecular ion peak, MS/MS spectra, and characteristic pears were highly similar. Thus, the chromatographic peak in the Naodeshengpian extract was identified as L-tryptophan(CAS 73-22-3,  $C_{11}H_{12}N_2O_2$ ).

## Suppl. 6 Identification of chlorogenic acid

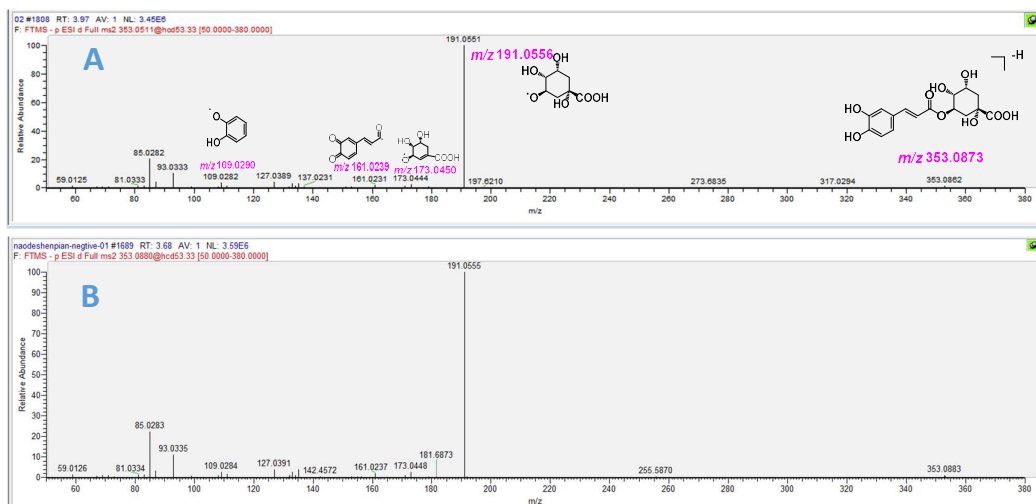

**Fig. S6.1** The main results of standard chlorogenic acid (CAS 327-97-9,  $C_{16}H_{18}O_9$ ) and its corresponding peak in the TIC diagram using UPLC-Q-Orbitrap-MS analysis. **(A)** The MS/MS fragments of standard chlorogenic acid. **(B)** The MS/MS spectra from chromatographic peak in the Naodeshengpian extract.

**Note:** The  $m/z$  values in purple are the calculated ones. The  $m/z$  calculation was based on the relative atomic masses of C (12.0000), H (1.007825), O (15.994915), and N (14.003074)<sup>[1]</sup>.

**Identification:** As seen in [Fig. S6.1](#), the R.T. value, molecular ion peak, MS/MS spectra, and characteristic peaks were highly similar. Thus, the chromatographic peak in the Naodeshengpian extract was identified as chlorogenic acid (CAS 327-97-9,  $C_{16}H_{18}O_9$ ).

Suppl. 7 Identification of hydroxy safflor yellow A CAS 78281-02-4

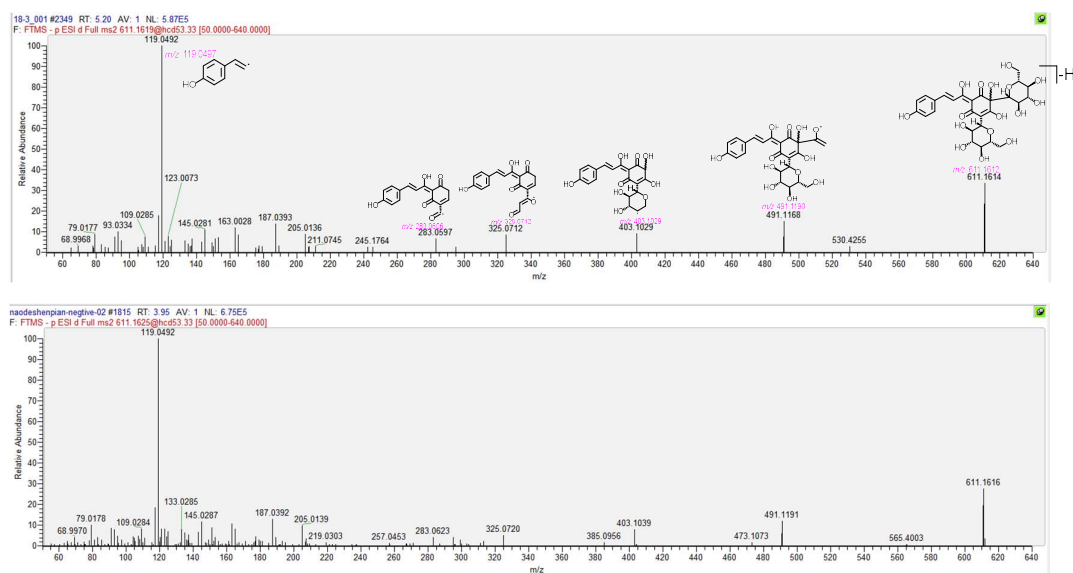

**Fig. S7.1** The main results of standard hydroxy safflor yellow A(CAS 78281-02-4,  $C_{27}H_{32}O_{16}$ )and its corresponding peak in the TIC diagram using UPLC-Q-Orbitrap-MS analysis. **(A)** The MS/MS fragments of standard hydroxy safflor yellow A. **(B)** The MS/MS spectra from chromatographic peak in the Naodeshengpian extract.

**Note:** The  $m/z$  values in purple are the calculated ones. The  $m/z$  calculation was based on the relative atomic masses of C (12.0000), H (1.007825), O (15.994915), and N (14.003074)<sup>[1]</sup>.

**Identification:** As seen in Fig. S7.1, the R.T. value, molecular ion peak, MS/MS spectra, and characteristic pears were highly similar. Thus, the chromatographic peak in the Naodeshengpian extract was identified as hydroxy safflor yellow A(CAS 78281-02-4,  $C_{27}H_{32}O_{16}$ ).

*Suppl. 8 Identification of vanillic acid CAS 121-34-6*

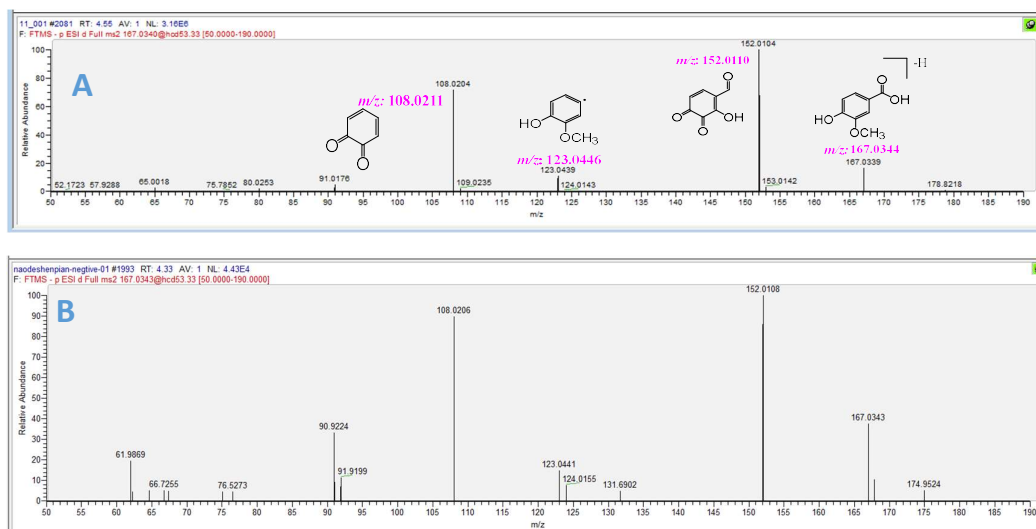

**Fig. S8.1** The main results of standard vanillic acid(CAS 121-34-6,  $C_8H_8O_4$ )and its corresponding peak in the TIC diagram using UPLC-Q-Orbitrap-MS analysis. **(A)** The MS/MS fragments of standard vanillic acid. **(B)** The MS/MS spectra from chromatographic peak in the Naodeshengpian extract.

**Note:** The  $m/z$  values in purple are the calculated ones. The  $m/z$  calculation was based on the relative atomic masses of C (12.0000), H (1.007825), O (15.994915), and N (14.003074)<sup>[1]</sup>.

**Identification:** As seen in Fig. S8.1, the R.T. value, molecular ion peak, MS/MS spectra, and characteristic pears were highly similar. Thus, the chromatographic peak in the Naodeshengpian extract was identified as vanillic acid(CAS 121-34-6,  $C_8H_8O_4$ ).

Suppl. 9 Identification of caffeic acid CAS 331-39-5

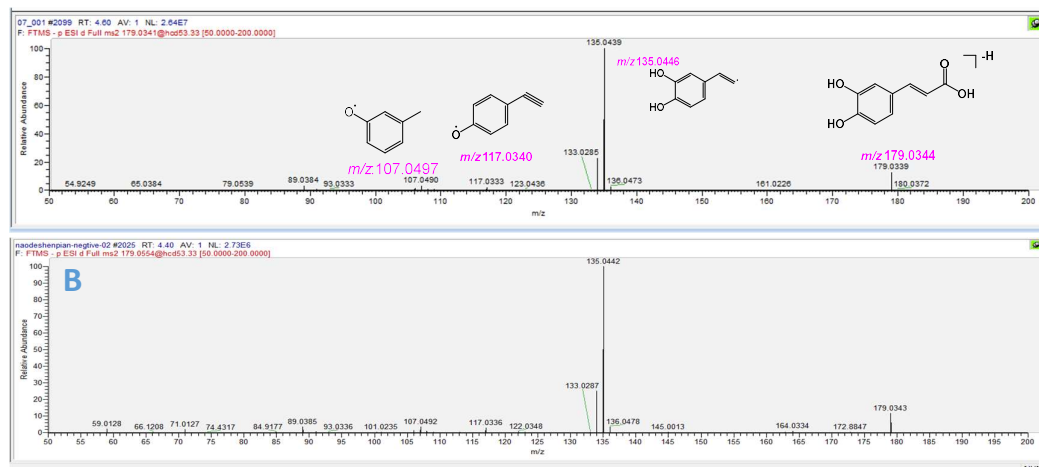

**Fig. S9.1** The main results of standard caffeic acid(CAS 331-39-5,  $C_9H_8O_4$ )and its corresponding peak in the TIC diagram using UPLC-Q-Orbitrap-MS analysis. **(A)** The MS/MS fragments of standard caffeic acid. **(B)** The MS/MS spectra from chromatographic peak in the Naodeshengpian extract.

**Note:** The  $m/z$  values in purple are the calculated ones. The  $m/z$  calculation was based on the relative atomic masses of C (12.0000), H (1.007825), O (15.994915), and N (14.003074)<sup>[1]</sup>.

**Identification:** As seen in **Fig. S9.1**, the R.T. value, molecular ion peak, MS/MS spectra, and characteristic pears were highly similar. Thus, the chromatographic peak in the Naodeshengpian extract was identified as caffeic acid(CAS 331-39-5,  $C_9H_8O_4$ ).

Suppl. 10 Identification of cryptochlorogenic acid CAS 905-99-7

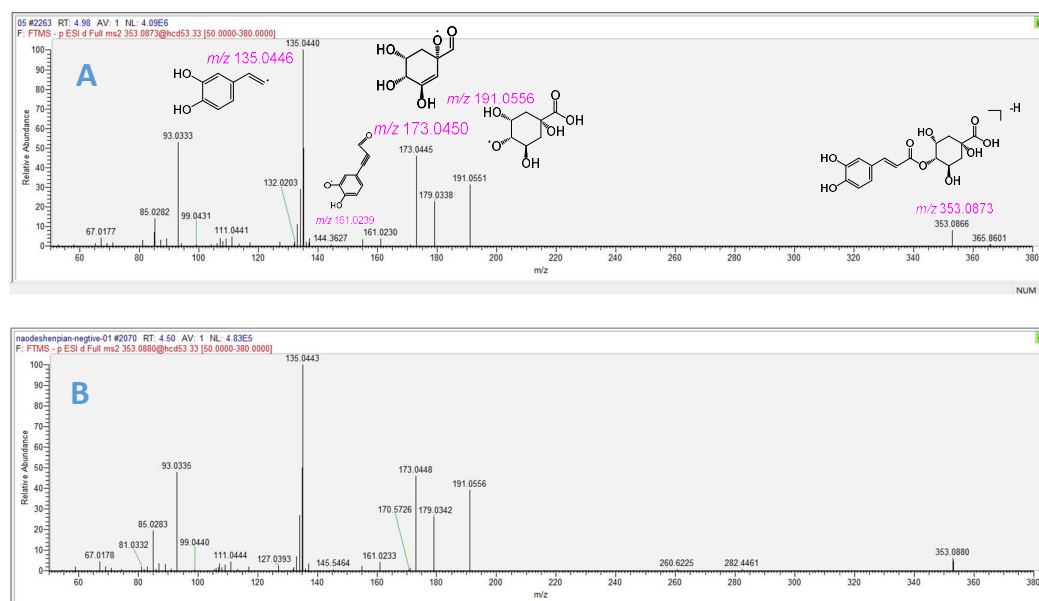

**Fig. S10.1** The main results of standard cryptochlorogenic acid (CAS 905-99-7,  $C_{16}H_{18}O_9$ ) and its corresponding peak in the TIC diagram using UPLC-Q-Orbitrap-MS analysis. **(A)** The MS/MS fragments of standard cryptochlorogenic acid. **(B)** The MS/MS spectra from chromatographic peak in the Naodeshengpian extract.

**Note:** The  $m/z$  values in purple are the calculated ones. The  $m/z$  calculation was based on the relative atomic masses of C (12.0000), H (1.007825), O (15.994915), and N (14.003074)<sup>[1]</sup>.

**Identification:** As seen in Fig. S10.1, the R.T. value, molecular ion peak, MS/MS spectra, and characteristic peaks were highly similar. Thus, the chromatographic peak in the Naodeshengpian extract was identified as cryptochlorogenic acid (CAS 905-99-7,  $C_{16}H_{18}O_9$ ).

Suppl. 11 Identification of 3'-hydroxy puerarin CAS 117060-54-5

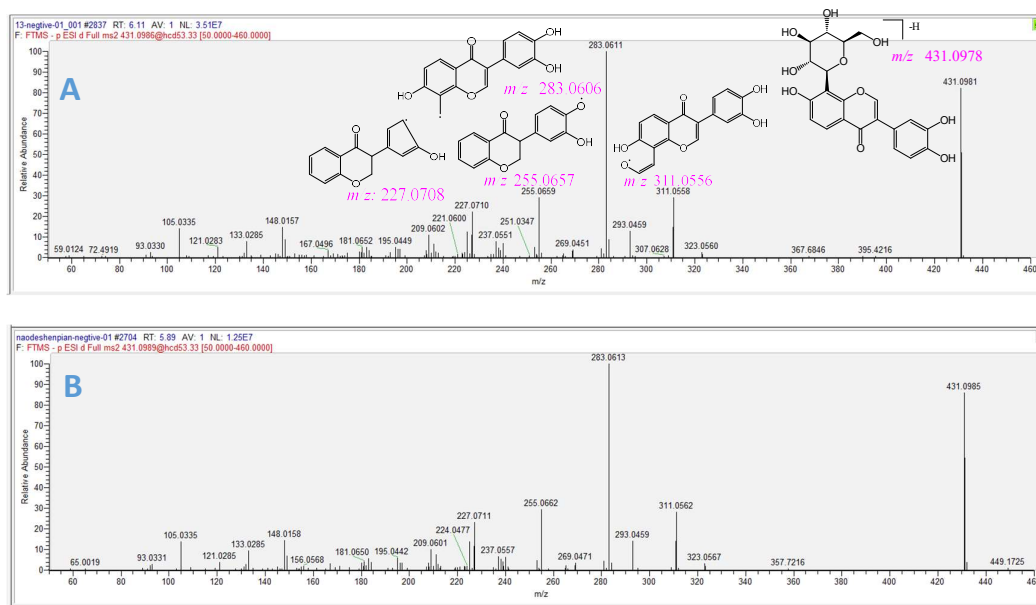

**Fig. S11.1** The main results of standard 3'-hydroxy puerarin (CAS 117060-54-5,  $C_{21}H_{20}O_{10}$ ) and its corresponding peak in the TIC diagram using UPLC-Q-Orbitrap-MS analysis. **(A)** The MS/MS fragments of standard 3'-hydroxy puerarin. **(B)** The MS/MS spectra from chromatographic peak in the Naodeshengpian extract.

**Note:** The  $m/z$  values in purple are the calculated ones. The  $m/z$  calculation was based on the relative atomic masses of C (12.0000), H (1.007825), O (15.994915), and N (14.003074)<sup>[1]</sup>.

**Identification:** As seen in Fig. S11.1, the R.T. value, molecular ion peak, MS/MS spectra, and characteristic peaks were highly similar. Thus, the chromatographic peak in the Naodeshengpian extract was identified as 3'-hydroxy puerarin (CAS 117060-54-5,  $C_{21}H_{20}O_{10}$ ).

Suppl. 12 Identification of puerarin CAS 3681-99-0

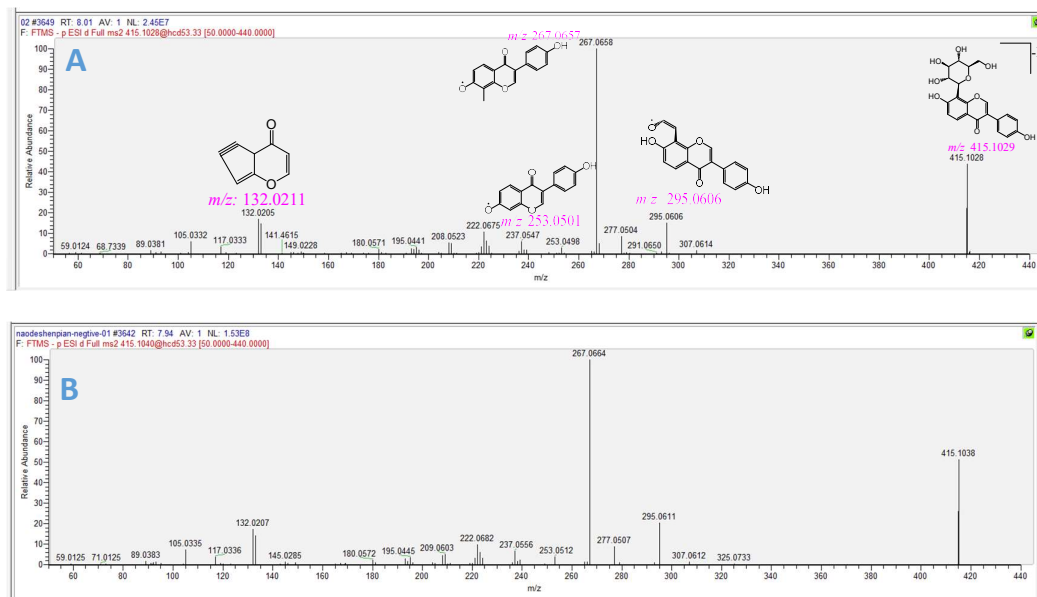

**Fig. S12.1** The main results of standard puerarin(CAS 3681-99-0,  $C_{21}H_{20}O_9$ )and its corresponding peak in the TIC diagram using UPLC-Q-Orbitrap-MS analysis. **(A)** The MS/MS fragments of standard puerarin. **(B)** The MS/MS spectra from chromatographic peak in the Naodeshengpian extract.

**Note:** The  $m/z$  values in purple are the calculated ones. The  $m/z$  calculation was based on the relative atomic masses of C (12.0000), H (1.007825), O (15.994915), and N (14.003074)<sup>[1]</sup>.

**Identification:** As seen in Fig. S12.1, the R.T. value, molecular ion peak, MS/MS spectra, and characteristic pears were highly similar. Thus, the chromatographic peak in the Naodeshengpian extract was identified as puerarin(CAS 3681-99-0,  $C_{21}H_{20}O_9$ ).



Suppl. 13 Identification of 3'-methoxy puerarin CAS 117047-07-1

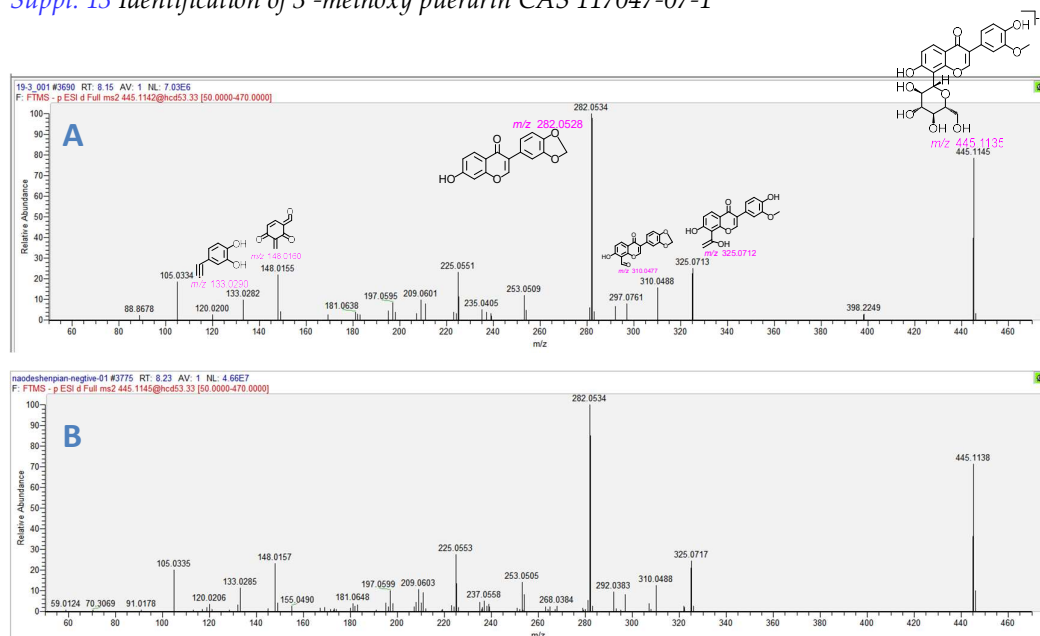

**Fig. S13.1** The main results of standard 3'-methoxy puerarin(CAS 117047-07-1,  $C_{22}H_{22}O_{10}$ )and its corresponding peak in the TIC diagram using UPLC-Q-Orbitrap-MS analysis. **(A)** The MS/MS fragments of standard 3' -methoxy puerarin. **(B)** The MS/MS spectra from chromatographic peak in the Naodeshengpian extract.

**Note:** The  $m/z$  values in purple are the calculated ones. The  $m/z$  calculation was based on the relative atomic masses of C (12.0000), H (1.007825), O (15.994915), and N (14.003074)<sup>[1]</sup>.

**Identification:** As seen in Fig. S13.1, the R.T. value, molecular ion peak, MS/MS spectra, and characteristic pears were highly similar. Thus, the chromatographic peak in the Naodeshengpian extract was identified as 3'-methoxy puerarin(CAS 117047-07-1,  $C_{22}H_{22}O_{10}$ ).

Suppl. 14 Identification of mirificin CAS 103654-50-8

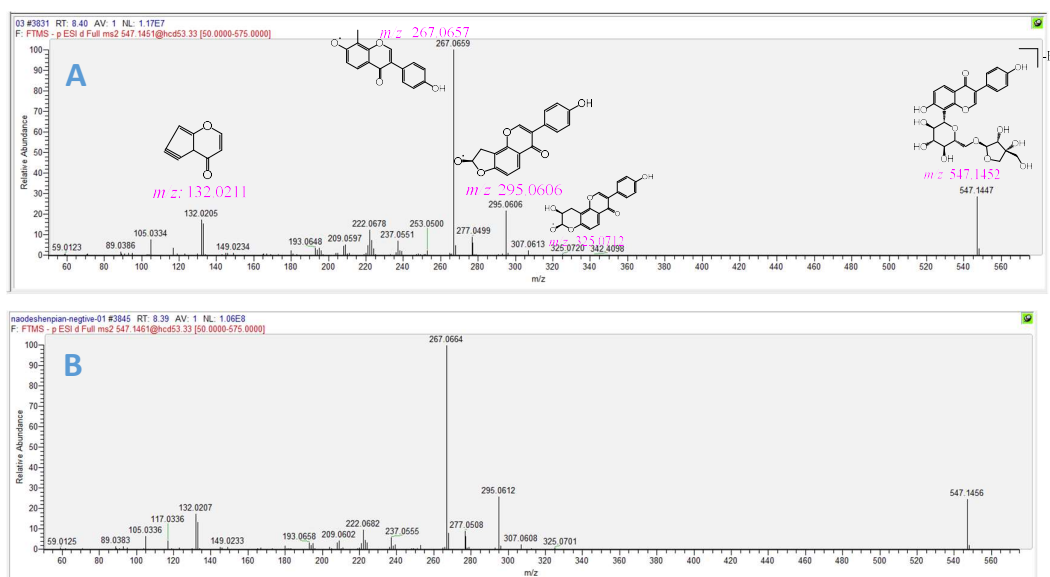

**Fig. S14.1** The main results of standard mirificin (CAS 103654-50-8,  $C_{26}H_{28}O_{13}$ ) and its corresponding peak in the TIC diagram using UPLC-Q-Orbitrap-MS analysis. (A) The MS/MS fragments of standard mirificin. (B) The MS/MS spectra from chromatographic peak in the Naodeshengpian extract.

**Note:** The  $m/z$  values in purple are the calculated ones. The  $m/z$  calculation was based on the relative atomic masses of C (12.0000), H (1.007825), O (15.994915), and N (14.003074)<sup>[1]</sup>.

**Identification:** As seen in Fig. S14.1, the R.T. value, molecular ion peak, MS/MS spectra, and characteristic peaks were highly similar. Thus, the chromatographic peak in the Naodeshengpian extract was identified as mirificin (CAS 103654-50-8,  $C_{26}H_{28}O_{13}$ ).

Suppl. 15 Identification of daidzin CAS 552-66-9

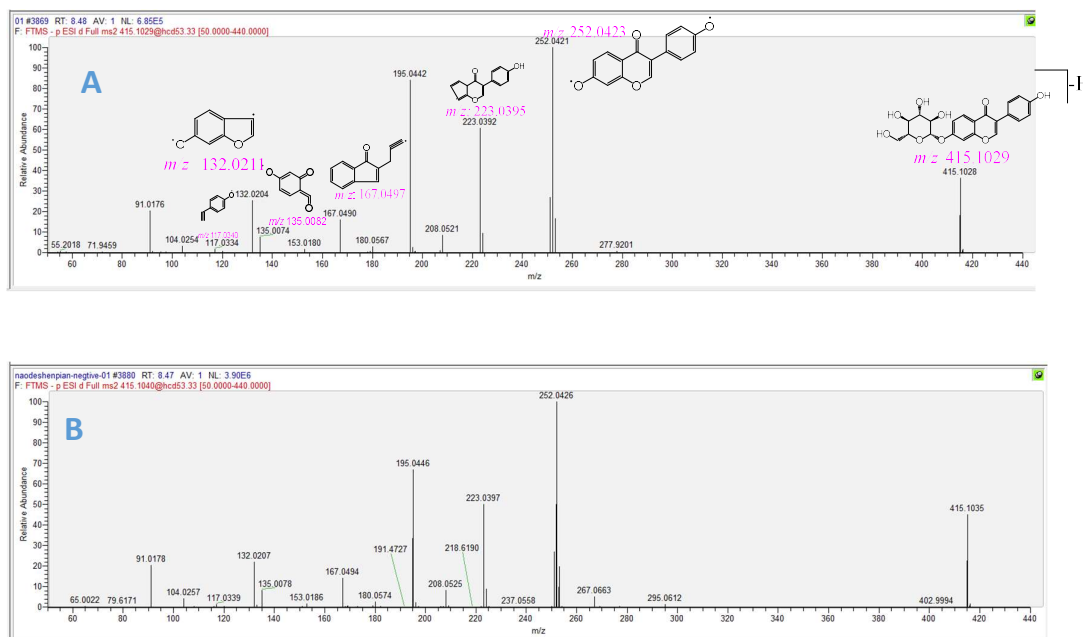

**Fig. S15.1** The main results of standard daidzin (CAS 552-66-9,  $C_{21}H_{20}O_9$ ) and its corresponding peak in the TIC diagram using UPLC-Q-Orbitrap-MS analysis. (A) The MS/MS fragments of standard daidzin. (B) The MS/MS spectra from chromatographic peak in the Naodeshengpian extract.

**Note:** The  $m/z$  values in purple are the calculated ones. The  $m/z$  calculation was based on the relative atomic masses of C (12.0000), H (1.007825), O (15.994915), and N (14.003074)<sup>[1]</sup>.

**Identification:** As seen in Fig. S15.1, the R.T. value, molecular ion peak, MS/MS spectra, and characteristic peaks were highly similar. Thus, the chromatographic peak in the Naodeshengpian extract was identified as daidzin (CAS 552-66-9,  $C_{21}H_{20}O_9$ ).

Suppl. 16 Identification of ferulic acid CAS 1135-24-6

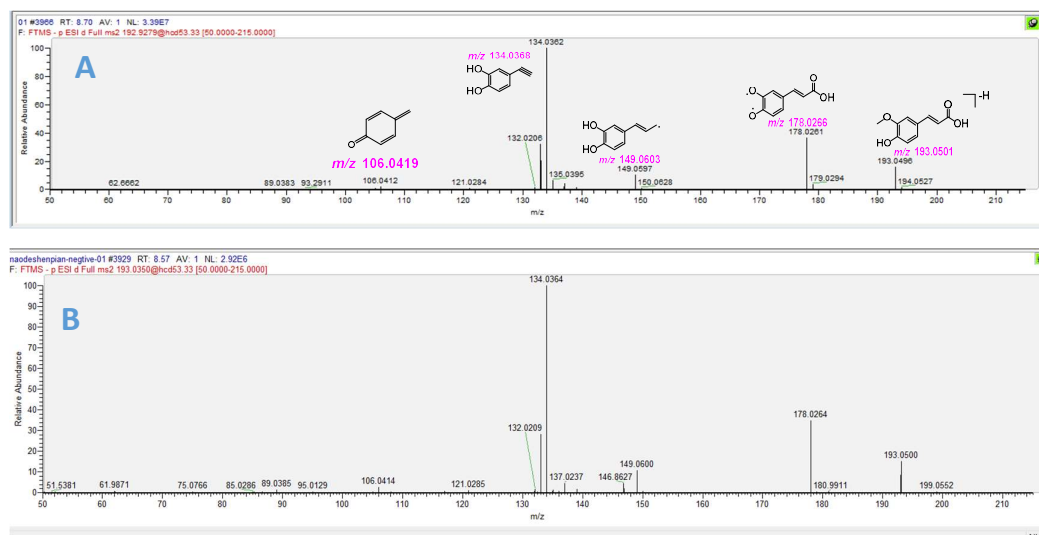

**Fig. S16.1** The main results of standard ferulic acid (CAS 1135-24-6,  $C_{10}H_{10}O_4$ ) and its corresponding peak in the TIC diagram using UPLC-Q-Orbitrap-MS analysis. (A) The MS/MS fragments of standard ferulic acid. (B) The MS/MS spectra from chromatographic peak in the Naodeshengpian extract.

**Note:** The  $m/z$  values in purple are the calculated ones. The  $m/z$  calculation was based on the relative atomic masses of C (12.0000), H (1.007825), O (15.994915), and N (14.003074)<sup>[1]</sup>.

**Identification:** As seen in Fig. S16.1, the R.T. value, molecular ion peak, MS/MS spectra, and characteristic peaks were highly similar. Thus, the chromatographic peak in the Naodeshengpian extract was identified as ferulic acid (CAS 1135-24-6,  $C_{10}H_{10}O_4$ ).

Suppl. 17 Identification of isoferulic acid CAS 537-73-5

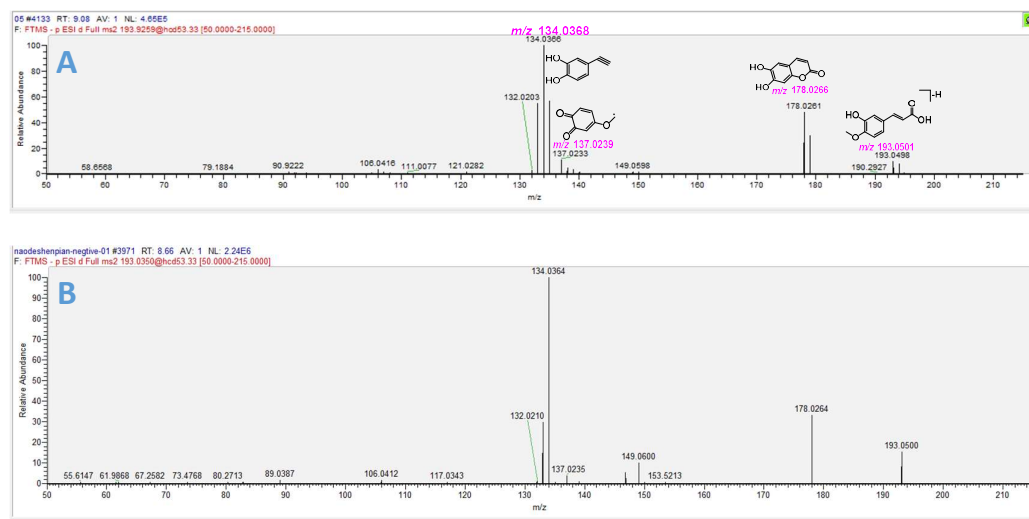

**Fig. S17.1** The main results of standard isoferulic acid(CAS 537-73-5,  $C_{10}H_{10}O_4$ )and its corresponding peak in the TIC diagram using UPLC-Q-Orbitrap-MS analysis. **(A)** The MS/MS fragments of standard isoferulic acid. **(B)** The MS/MS spectra from chromatographic peak in the Naodeshengpian extract.

**Note:** The  $m/z$  values in purple are the calculated ones. The  $m/z$  calculation was based on the relative atomic masses of C (12.0000), H (1.007825), O (15.994915), and N (14.003074)<sup>[1]</sup>.

**Identification:** As seen in Fig. S17.1, the R.T. value, molecular ion peak, MS/MS spectra, and characteristic peaks were highly similar. Thus, the chromatographic peak in the Naodeshengpian extract was identified as isoferulic acid(CAS 537-73-5,  $C_{10}H_{10}O_4$ ).

Suppl. 18 Identification of glycitin CAS 40246-10-4

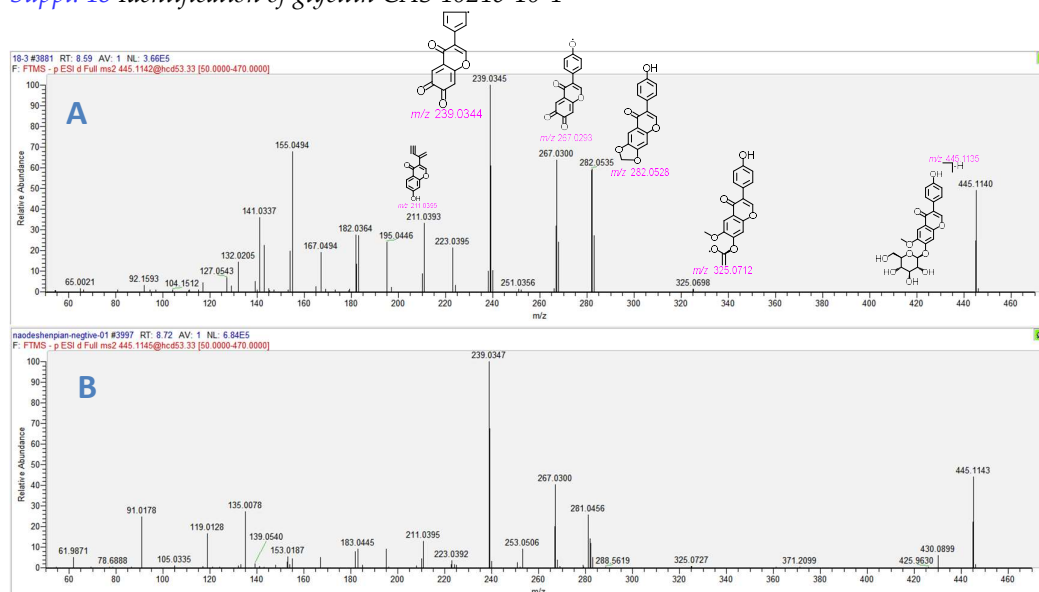

**Fig. S18.1** The main results of standard glycitin(CAS 40246-10-4,  $C_{22}H_{22}O_{10}$ )and its corresponding peak in the TIC diagram using UPLC-Q-Orbitrap-MS analysis. (A) The MS/MS fragments of standard glycitin. (B) The MS/MS spectra from chromatographic peak in the Naodeshengpian extract.

**Note:** The  $m/z$  values in purple are the calculated ones. The  $m/z$  calculation was based on the relative atomic masses of C (12.0000), H (1.007825), O (15.994915), and N (14.003074)<sup>[1]</sup>.

**Identification:** As seen in Fig. S18.1, the R.T. value, molecular ion peak, MS/MS spectra, and characteristic pears were highly similar. Thus, the chromatographic peak in the Naodeshengpian extract was identified as glycitin(CAS 40246-10-4,  $C_{22}H_{22}O_{10}$ ).

Suppl. 19 Identification of genistin CAS 529-59-9

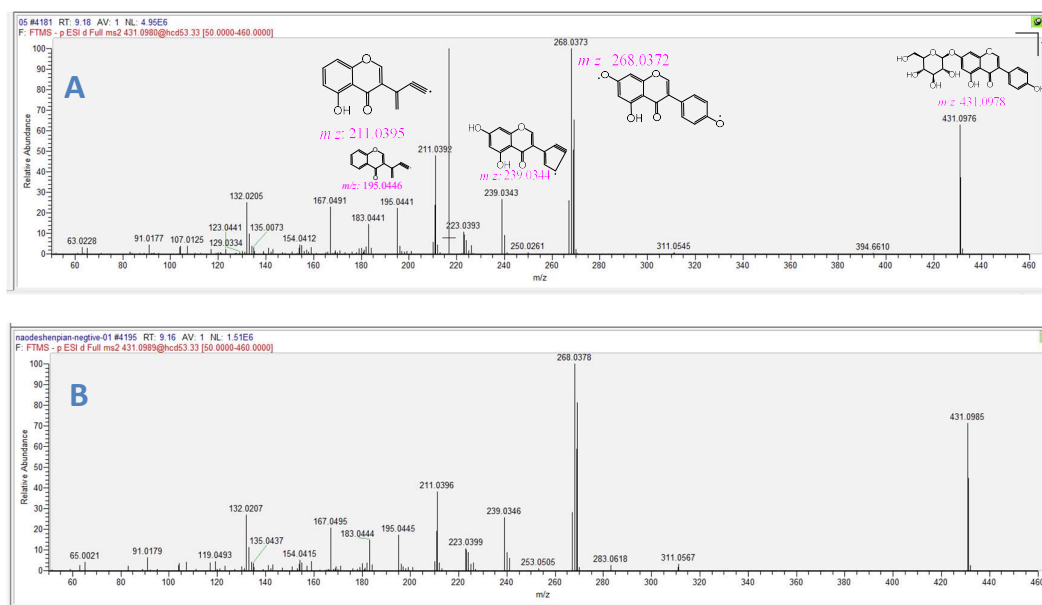

**Fig. S19.1** The main results of standard genistin(CAS 529-59-9,  $C_{21}H_{20}O_{10}$ )and its corresponding peak in the TIC diagram using UPLC-Q-Orbitrap-MS analysis. **(A)** The MS/MS fragments of standard genistin. **(B)** The MS/MS spectra from chromatographic peak in the Naodeshengpian extract.

**Note:** The  $m/z$  values in purple are the calculated ones. The  $m/z$  calculation was based on the relative atomic masses of C (12.0000), H (1.007825), O (15.994915), and N (14.003074)<sup>[1]</sup>.

**Identification:** As seen in Fig. S19.1, the R.T. value, molecular ion peak, MS/MS spectra, and characteristic pears were highly similar. Thus, the chromatographic peak in the Naodeshengpian extract was identified as genistin(CAS 529-59-9,  $C_{21}H_{20}O_{10}$ ).

Suppl. 20 Identification of 4-methyl-2,6-dimethoxyphenol CAS 6638-05-7

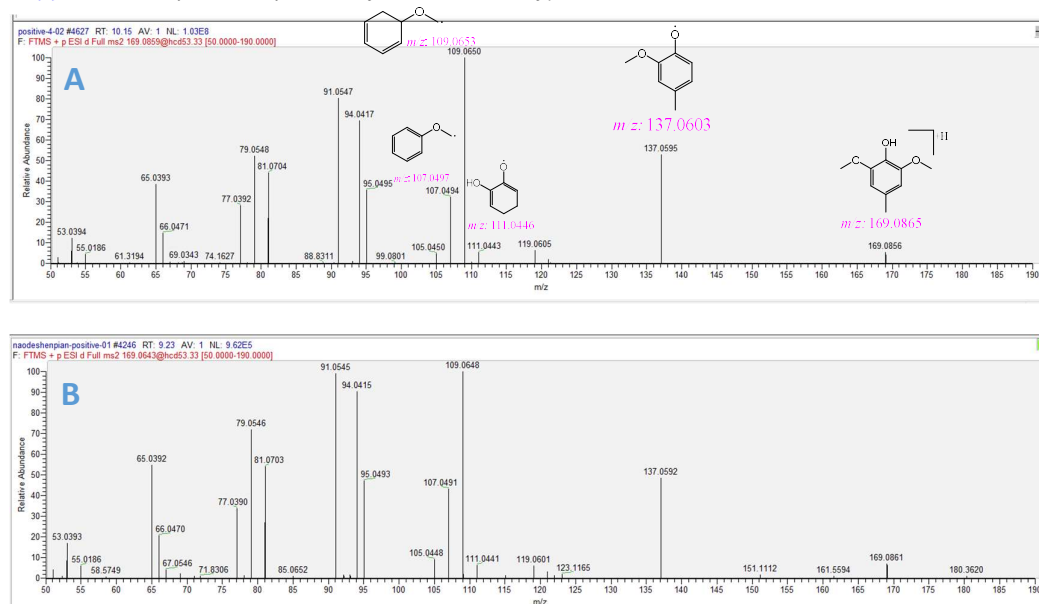

**Fig. S20.1** The main results of standard 4-methyl-2,6-dimethoxyphenol(CAS 6638-05-7, C<sub>9</sub>H<sub>12</sub>O<sub>3</sub>)and its corresponding peak in the TIC diagram using UPLC-Q-Orbitrap-MS analysis. **(A)** The MS/MS fragments of standard 4-methyl-2,6-dimethoxyphenol. **(B)** The MS/MS spectra from chromatographic peak in the Naodeshengpian extract.

**Note:** The  $m/z$  values in purple are the calculated ones. The  $m/z$  calculation was based on the relative atomic masses of C (12.0000), H (1.007825), O (15.994915), and N (14.003074)<sup>[1]</sup>.

**Identification:** As seen in Fig. S20.1, the R.T. value, molecular ion peak, MS/MS spectra, and characteristic pears were highly similar. Thus, the chromatographic peak in the Naodeshengpian extract was identified as 4-methyl-2,6-dimethoxyphenol(CAS 6638-05-7, C<sub>9</sub>H<sub>12</sub>O<sub>3</sub>).



Suppl. 21 Identification of hyperoside CAS 482-36-0

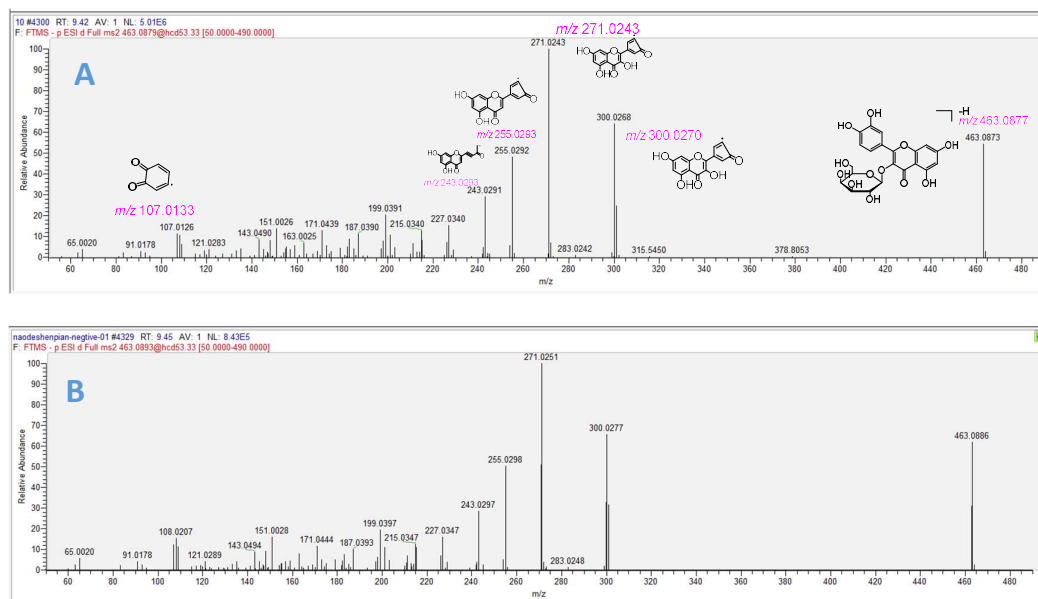

**Fig. S21.1** The main results of standard hyperoside(CAS 482-36-0,  $C_{21}H_{20}O_{12}$ )and its corresponding peak in the TIC diagram using UPLC-Q-Orbitrap-MS analysis. **(A)** The MS/MS fragments of standard hyperoside. **(B)** The MS/MS spectra from chromatographic peak in the Naodeshengpian extract.

**Note:** The  $m/z$  values in purple are the calculated ones. The  $m/z$  calculation was based on the relative atomic masses of C (12.0000), H (1.007825), O (15.994915), and N (14.003074)<sup>[1]</sup>.

**Identification:** As seen in Fig. S21.1, the R.T. value, molecular ion peak, MS/MS spectra, and characteristic pears were highly similar. Thus, the chromatographic peak in the Naodeshengpian extract was identified as hyperoside(CAS 482-36-0,  $C_{21}H_{20}O_{12}$ ).

## Suppl. 22 Identification of rutin CAS 153-18-4

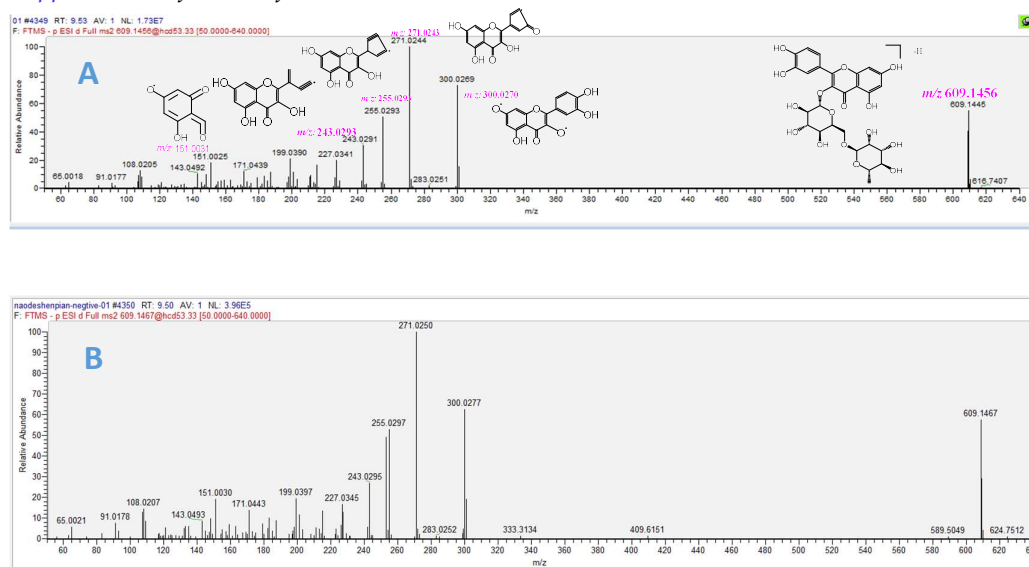

**Fig. S22.1** The main results of standard rutin(CAS 153-18-4,  $C_{27}H_{30}O_{16}$ )and its corresponding peak in the TIC diagram using UPLC-Q-Orbitrap-MS analysis. **(A)** The MS/MS fragments of standard rutin. **(B)** The MS/MS spectra from chromatographic peak in the Naodeshengpian extract.

**Note:** The  $m/z$  values in purple are the calculated ones. The  $m/z$  calculation was based on the relative atomic masses of C (12.0000), H (1.007825), O (15.994915), and N (14.003074)<sup>[1]</sup>.

**Identification:** As seen in Fig. S22.1, the R.T. value, molecular ion peak, MS/MS spectra, and characteristic pears were highly similar. Thus, the chromatographic peak in the Naodeshengpian extract was identified as rutin(CAS 153-18-4,  $C_{27}H_{30}O_{16}$ ).

Suppl. 23 Identification of isoquercitrin CAS 482-35-9

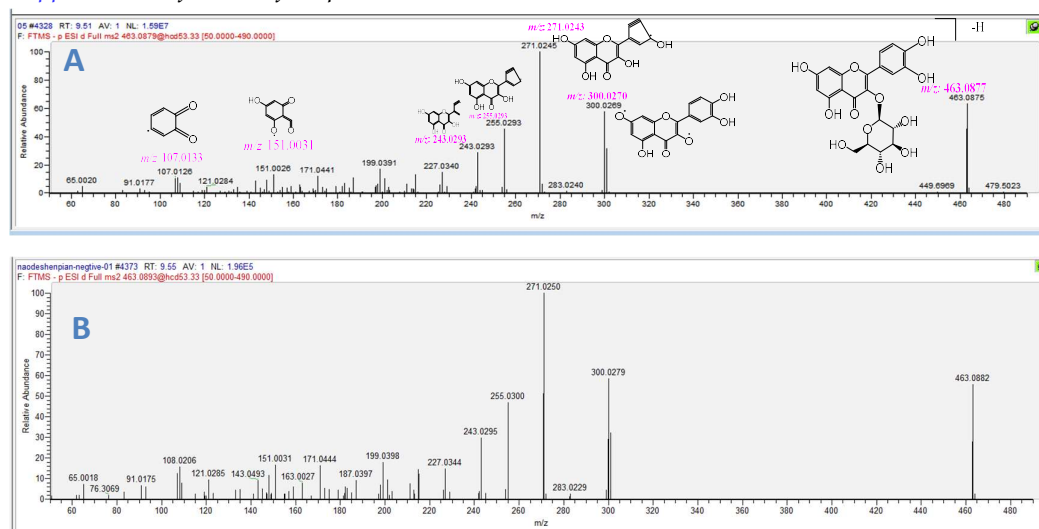

**Fig. S23.1** The main results of standard isoquercitrin(CAS 482-35-9,  $C_{21}H_{20}O_{12}$ )and its corresponding peak in the TIC diagram using UPLC-Q-Orbitrap-MS analysis. **(A)** The MS/MS fragments of standard isoquercitrin. **(B)** The MS/MS spectra from chromatographic peak in the Naodeshengpian extract.

**Note:** The  $m/z$  values in purple are the calculated ones. The  $m/z$  calculation was based on the relative atomic masses of C (12.0000), H (1.007825), O (15.994915), and N (14.003074)<sup>[1]</sup>.

**Identification:** As seen in Fig. S23.1, the R.T. value, molecular ion peak, MS/MS spectra, and characteristic pears were highly similar. Thus, the chromatographic peak in the Naodeshengpian extract was identified as Isoquercitrin(CAS 482-35-9,  $C_{21}H_{20}O_{12}$ ).

Suppl. 24 Identification of naringin CAS 10236-47-2

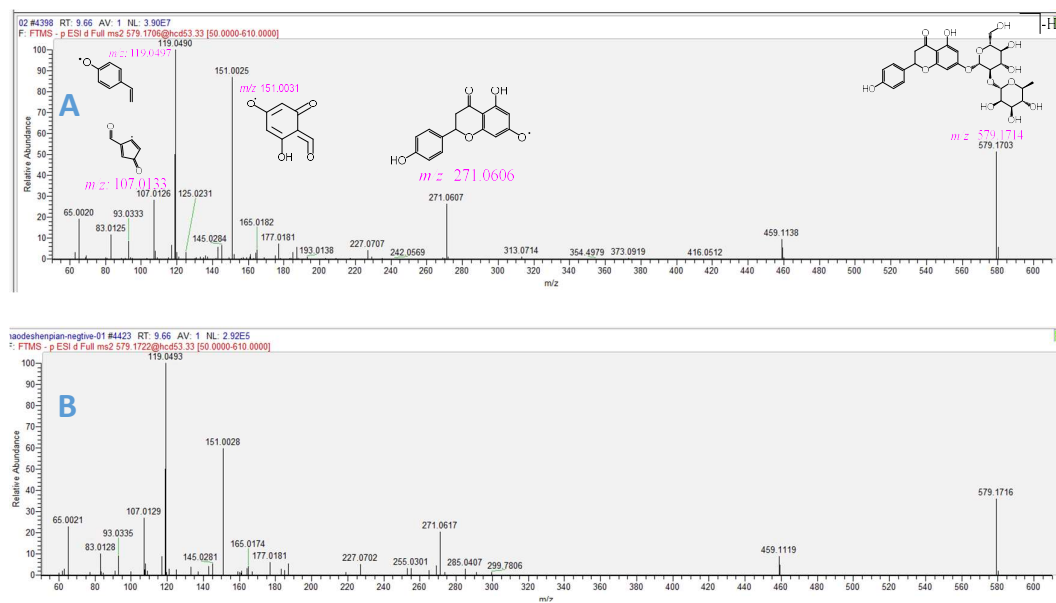

**Fig. S24.1** The main results of standard naringin(CAS 10236-47-2,  $C_{27}H_{32}O_{14}$ )and its corresponding peak in the TIC diagram using UPLC-Q-Orbitrap-MS analysis. **(A)** The MS/MS fragments of standard naringin. **(B)** The MS/MS spectra from chromatographic peak in the Naodeshengpian extract.

**Note:** The  $m/z$  values in purple are the calculated ones. The  $m/z$  calculation was based on the relative atomic masses of C (12.0000), H (1.007825), O (15.994915), and N (14.003074)<sup>[1]</sup>.

**Identification:** As seen in Fig. S24.1, the R.T. value, molecular ion peak, MS/MS spectra, and characteristic pears were highly similar. Thus, the chromatographic peak in the Naodeshengpian extract was identified as naringin(CAS 10236-47-2,  $C_{27}H_{32}O_{14}$ ).

Suppl. 25 Identification of cosmosiin CAS 578-74-5

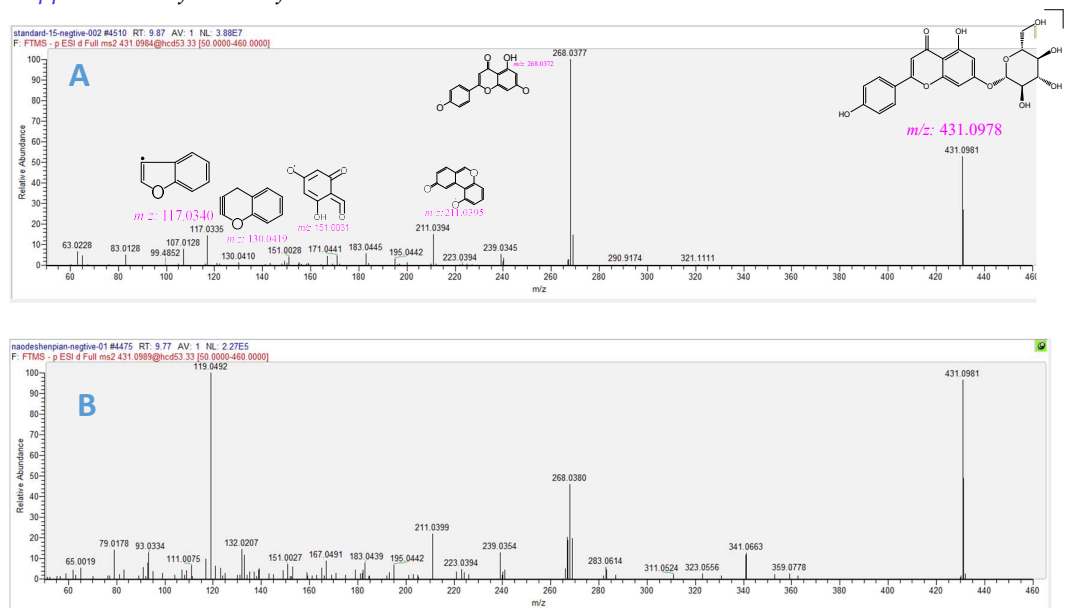

**Fig. S25.1** The main results of standard cosmosiin(CAS 578-74-5,  $C_{21}H_{20}O_{10}$ )and its corresponding peak in the TIC diagram using UPLC-Q-Orbitrap-MS analysis. **(A)** The MS/MS fragments of standard cosmosiin. **(B)** The MS/MS spectra from chromatographic peak in the Naodeshengpian extract.

**Note:** The  $m/z$  values in purple are the calculated ones. The  $m/z$  calculation was based on the relative atomic masses of C (12.0000), H (1.007825), O (15.994915), and N (14.003074)<sup>[1]</sup>.

**Identification:** As seen in Fig. S25.1, the R.T. value, molecular ion peak, MS/MS spectra, and characteristic pears were highly similar. Thus, the chromatographic peak in the Naodeshengpian extract was identified as cosmosiin(CAS 578-74-5,  $C_{21}H_{20}O_{10}$ ).

Suppl. 26 Identification of astragalin CAS 480-10-4

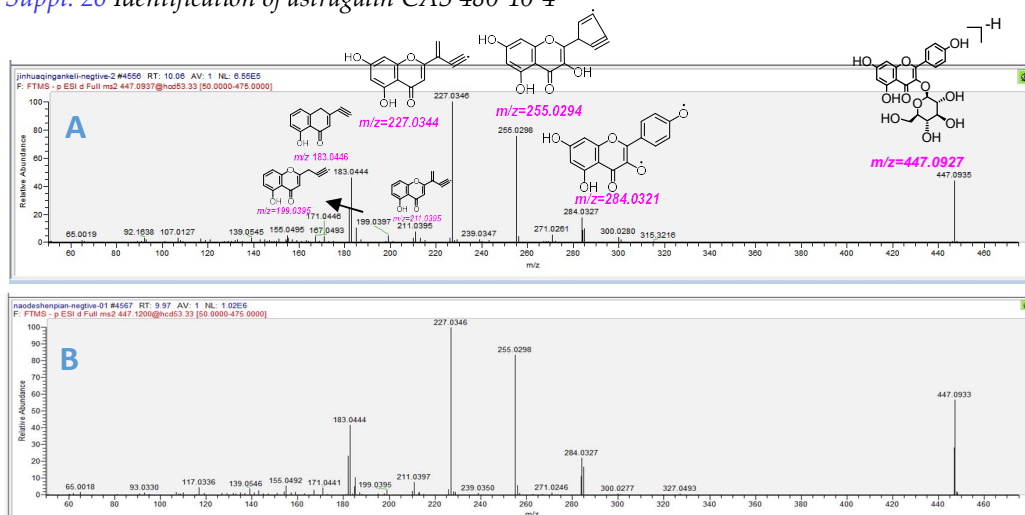

**Fig. S26.1** The main results of standard astragalin(CAS 480-10-4,  $C_{21}H_{20}O_{11}$ )and its corresponding peak in the TIC diagram using UPLC-Q-Orbitrap-MS analysis. **(A)** The MS/MS fragments of standard astragalin. **(B)** The MS/MS spectra from chromatographic peak in the Naodeshengpian extract.

**Note:** The  $m/z$  values in purple are the calculated ones. The  $m/z$  calculation was based on the relative atomic masses of C (12.0000), H (1.007825), O (15.994915), and N (14.003074)<sup>[1]</sup>.

**Identification:** As seen in Fig. S26.1, the R.T. value, molecular ion peak, MS/MS spectra, and characteristic pears were highly similar. Thus, the chromatographic peak in the Naodeshengpian extract was identified as astragalin(CAS 480-10-4,  $C_{21}H_{20}O_{11}$ ).

Suppl. 27 Identification of 2'-hydroxygenistein CAS 1156-78-1

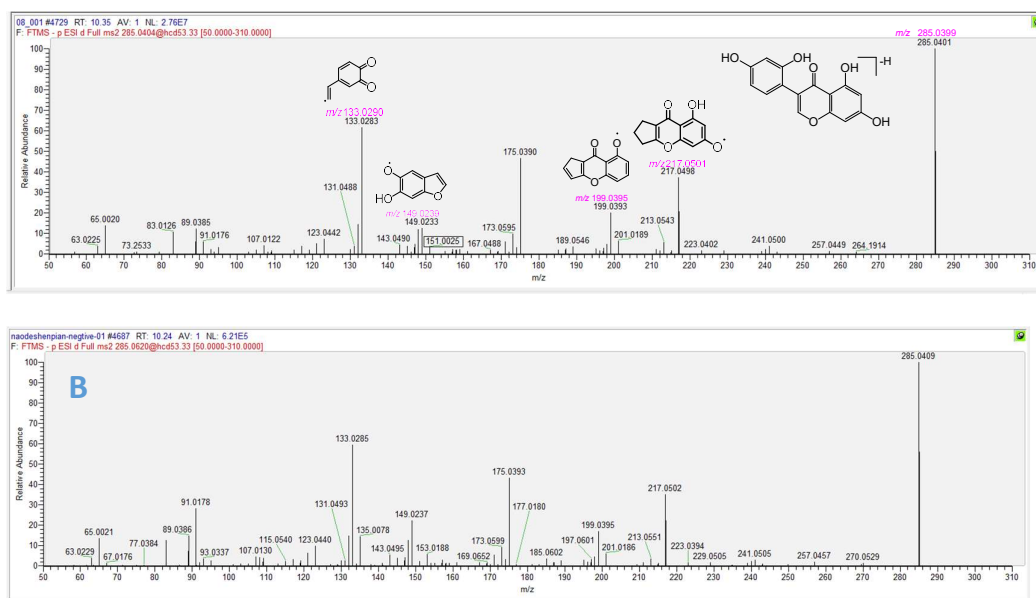

Fig. S27.1 The main results of standard 2'-hydroxygenistein(CAS 1156-78-1,  $C_{15}H_{10}O_6$ ) and its corresponding peak in the TIC diagram using UPLC-Q-Orbitrap-MS analysis. (A) The MS/MS fragments of standard 2'-hydroxygenistein. (B) The MS/MS spectra from chromatographic peak in the Naodeshengpian extract.

**Note:** The  $m/z$  values in purple are the calculated ones. The  $m/z$  calculation was based on the relative atomic masses of C (12.0000), H (1.007825), O (15.994915), and N (14.003074)<sup>[1]</sup>.

**Identification:** As seen in Fig. S27.1, the R.T. value, molecular ion peak, MS/MS spectra, and characteristic pears were highly similar. Thus, the chromatographic peak in the Naodeshengpian extract was identified as 2'-hydroxygenistein(CAS 1156-78-1,  $C_{15}H_{10}O_6$ ).

Suppl. 28 Identification of daidzein CAS 486-66-8

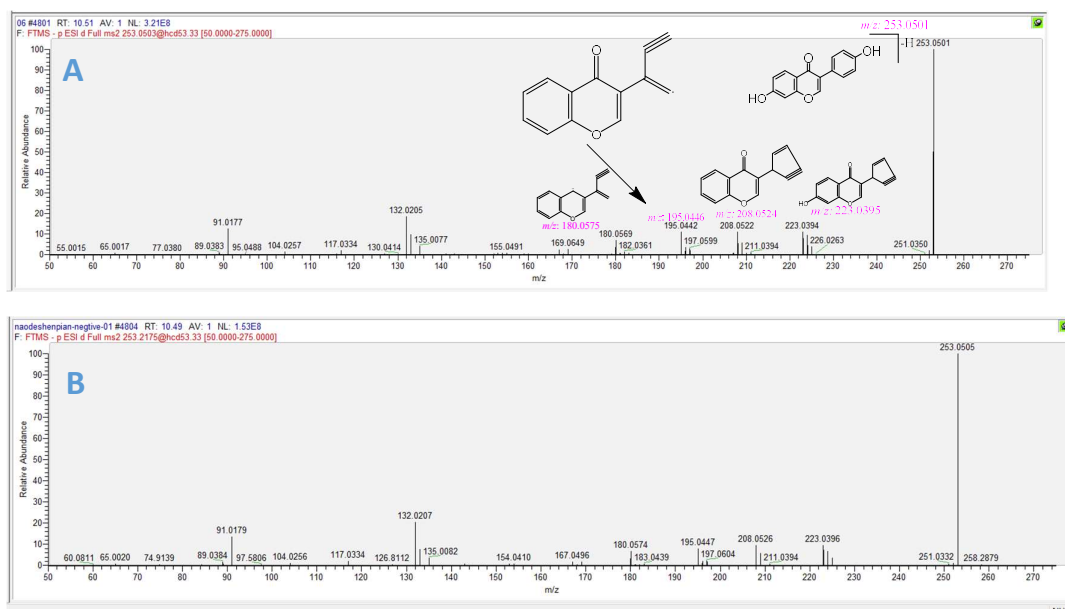

**Fig. S28.1** The main results of standard daidzein(CAS 486-66-8,  $C_{15}H_{10}O_4$ )and its corresponding peak in the TIC diagram using UPLC-Q-Orbitrap-MS analysis. **(A)** The MS/MS fragments of standard daidzein. **(B)** The MS/MS spectra from chromatographic peak in the Naodeshengpian extract.

**Note:** The  $m/z$  values in purple are the calculated ones. The  $m/z$  calculation was based on the relative atomic masses of C (12.0000), H (1.007825), O (15.994915), and N (14.003074)<sup>[1]</sup>.

**Identification:** As seen in Fig. S28.1, the R.T. value, molecular ion peak, MS/MS spectra, and characteristic pears were highly similar. Thus, the chromatographic peak in the Naodeshengpian extract was identified as daidzein(CAS486-66-8,  $C_{15}H_{10}O_4$ ).



Suppl. 29 Identification of calycosin CAS 20575-57-9

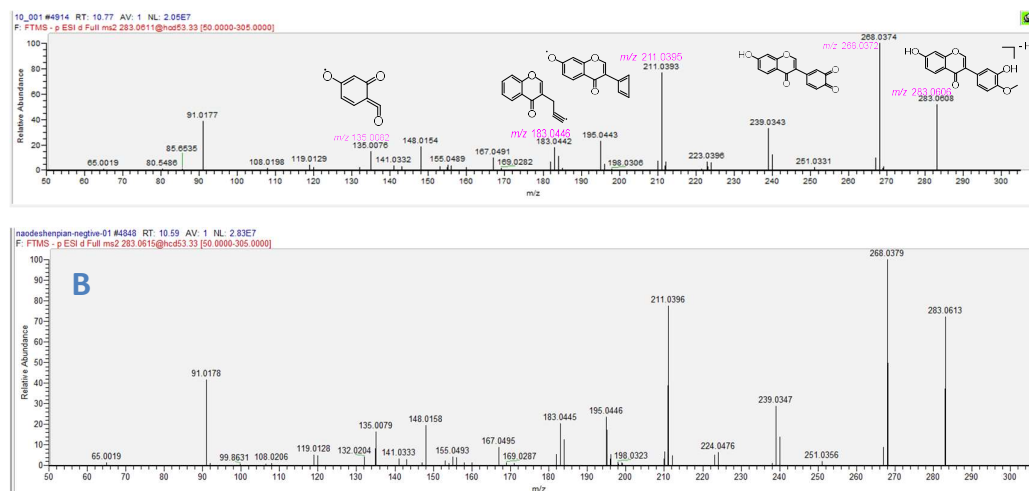

**Fig. S29.1** The main results of standard calycosin(CAS 20575-57-9,  $C_{16}H_{12}O_5$ )and its corresponding peak in the TIC diagram using UPLC-Q-Orbitrap-MS analysis. **(A)** The MS/MS fragments of standard calycosin. **(B)** The MS/MS spectra from chromatographic peak in the Naodeshengpian extract.

**Note:** The  $m/z$  values in purple are the calculated ones. The  $m/z$  calculation was based on the relative atomic masses of C (12.0000), H (1.007825), O (15.994915), and N (14.003074)<sup>[1]</sup>.

**Identification:** As seen in Fig. S29.1, the R.T. value, molecular ion peak, MS/MS spectra, and characteristic pears were highly similar. Thus, the chromatographic peak in the Naodeshengpian extract was identified as calycosin(CAS 20575-57-9,  $C_{16}H_{12}O_5$ ).

Suppl. 30 Identification of quercetin CAS 117-39-5

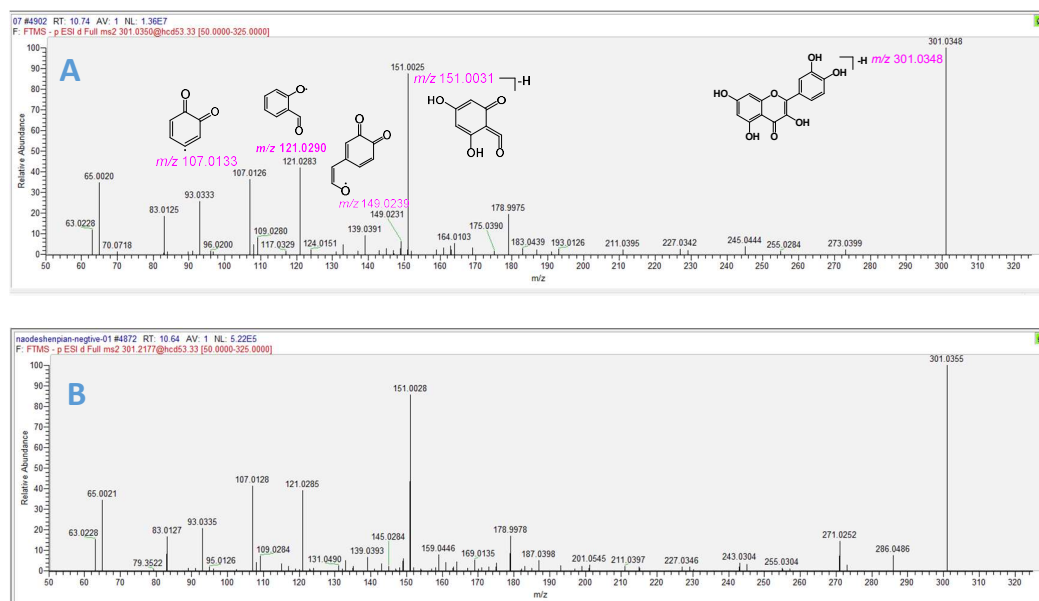

**Fig. S30.1** The main results of standard quercetin(CAS 117-39-5,  $C_{15}H_{10}O_7$ )and its corresponding peak in the TIC diagram using UPLC-Q-Orbitrap-MS analysis. **(A)** The MS/MS fragments of standard quercetin. **(B)** The MS/MS spectra from chromatographic peak in the Naodeshengpian extract.

**Note:** The  $m/z$  values in purple are the calculated ones. The  $m/z$  calculation was based on the relative atomic masses of C (12.0000), H (1.007825), O (15.994915), and N (14.003074)<sup>[1]</sup>.

**Identification:** As seen in Fig. S30.1, the R.T. value, molecular ion peak, MS/MS spectra, and characteristic pears were highly similar. Thus, the chromatographic peak in the Naodeshengpian extract was identified as quercetin(CAS 117-39-5,  $C_{15}H_{10}O_7$ ).

Suppl. 31 Identification of 7,4'-dihydroxyflavone CAS 2196-14-7

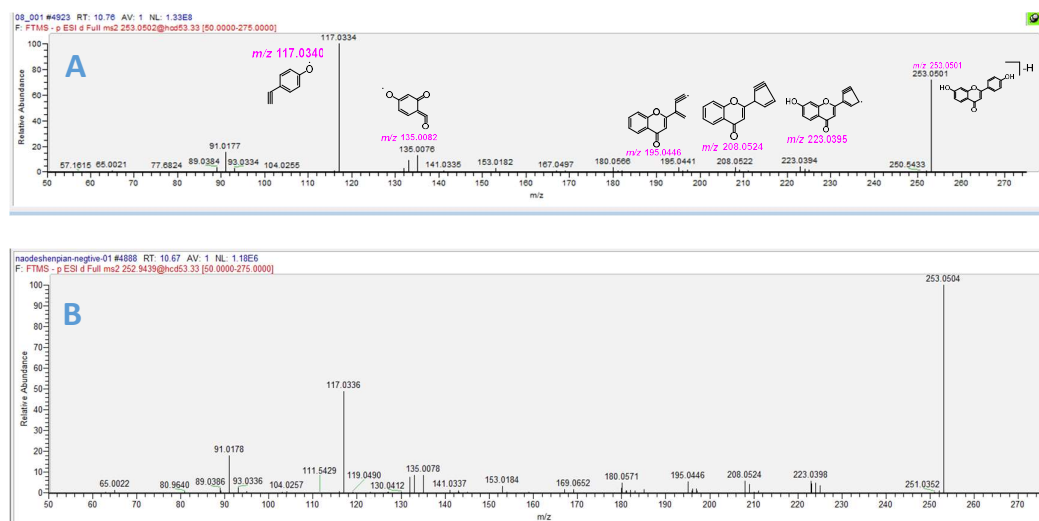

**Fig. S31.1** The main results of standard 7,4'-dihydroxyflavone(CAS 2196-14-7,  $C_{15}H_{10}O_4$ )and its corresponding peak in the TIC diagram using UPLC-Q-Orbitrap-MS analysis. **(A)** The MS/MS fragments of standard 7,4'-dihydroxyflavone. **(B)** The MS/MS spectra from chromatographic peak in the Naodeshengpian extract.

**Note:** The  $m/z$  values in purple are the calculated ones. The  $m/z$  calculation was based on the relative atomic masses of C (12.0000), H (1.007825), O (15.994915), and N (14.003074)<sup>[1]</sup>.

**Identification:** As seen in Fig. S31.1, the R.T. value, molecular ion peak, MS/MS spectra, and characteristic pears were highly similar. Thus, the chromatographic peak in the Naodeshengpian extract was identified as 7,4'-dihydroxyflavone(CAS 2196-14-7,  $C_{15}H_{10}O_4$ ).

Suppl. 32 Identification of syringic acid CAS 530-57-4

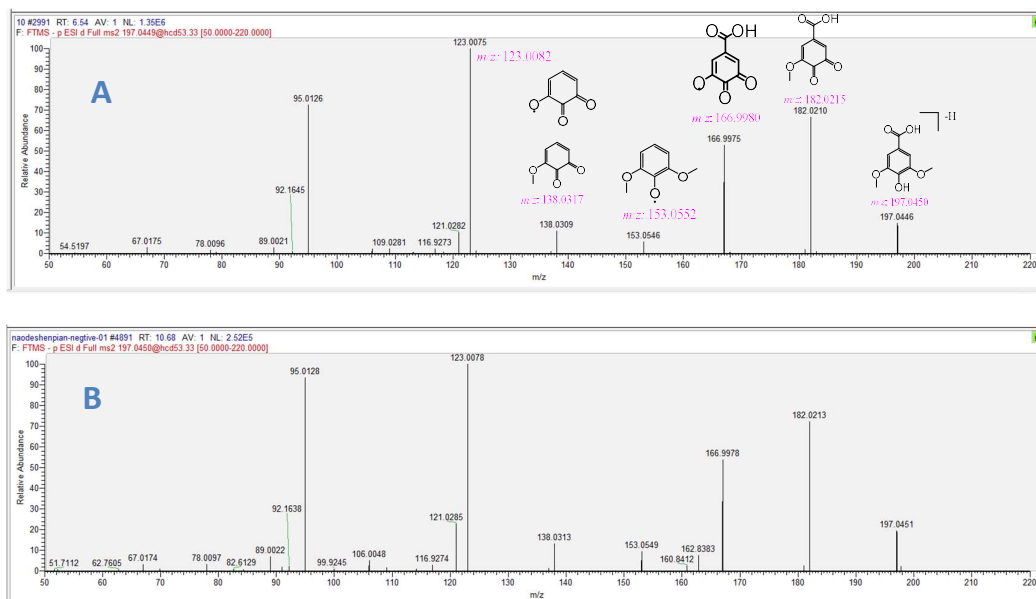

**Fig. S32.1** The main results of standard syringic acid(CAS 530-57-4,  $C_9H_{10}O_5$ )and its corresponding peak in the TIC diagram using UPLC-Q-Orbitrap-MS analysis. **(A)** The MS/MS fragments of standard syringic acid. **(B)** The MS/MS spectra from chromatographic peak in the Naodeshengpian extract.

**Note:** The  $m/z$  values in purple are the calculated ones. The  $m/z$  calculation was based on the relative atomic masses of C (12.0000), H (1.007825), O (15.994915), and N (14.003074)<sup>[1]</sup>.

**Identification:** As seen in Fig. S32.1, the R.T. value, molecular ion peak, MS/MS spectra, and characteristic pears were highly similar. Thus, the chromatographic peak in the Naodeshengpian extract was identified as syringic acid(CAS 530-57-4,  $C_9H_{10}O_5$ ).

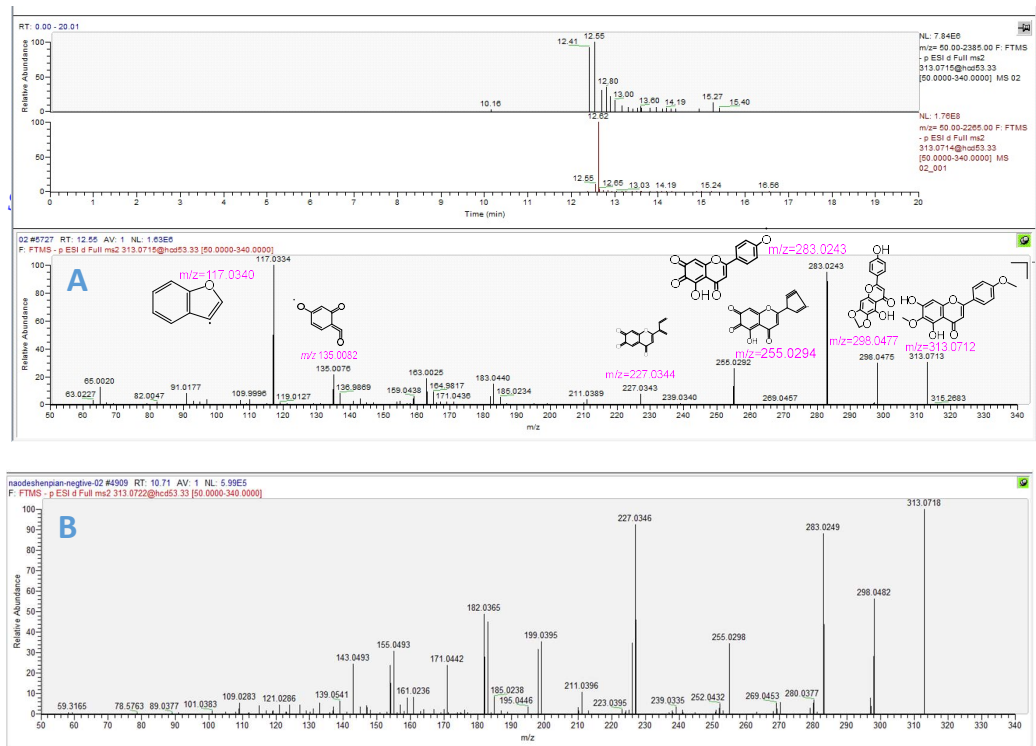

**Fig. S33.1** The main results of standard pectolinarigenin(CAS 520-12-7,  $C_{17}H_{14}O_6$ )and its corresponding peak in the TIC diagram using UPLC-Q-Orbitrap-MS analysis. **(A)** The MS/MS fragments of standard pectolinarigenin. **(B)** The MS/MS spectra from chromatographic peak in the Naodeshengpian extract.

**Note:** The  $m/z$  values in purple are the calculated ones. The  $m/z$  calculation was based on the relative atomic masses of C (12.0000), H (1.007825), O (15.994915), and N (14.003074)<sup>[1]</sup>.

**Identification:** As seen in Fig. S33.1, the R.T. value, molecular ion peak, MS/MS spectra, and characteristic pears were highly similar. Thus, the chromatographic peak in the Naodeshengpian extract was identified as pectolinarigenin(CAS 520-12-7,  $C_{17}H_{14}O_6$ ).

Suppl. 34 Identification of luteolin CAS 491-70-3

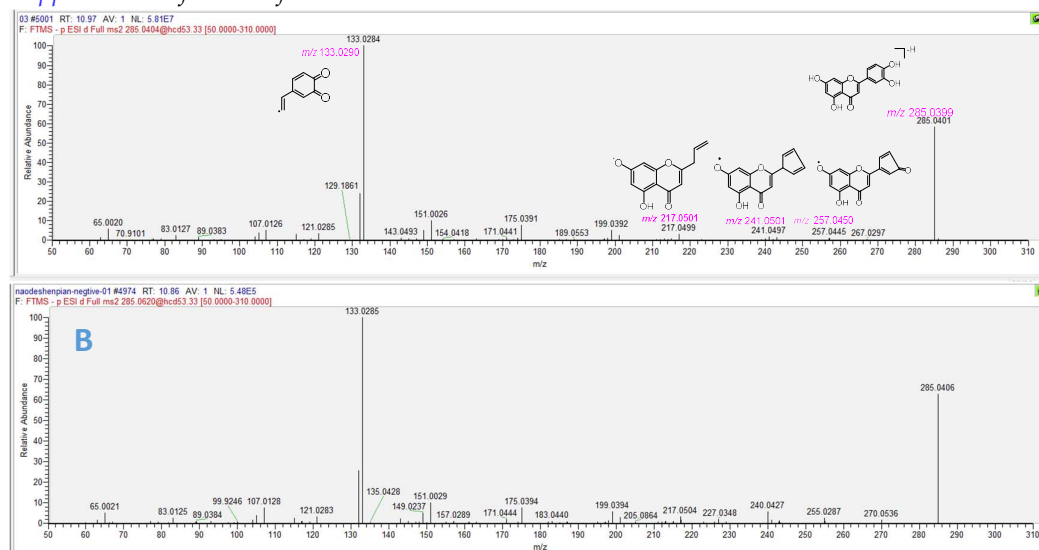

**Fig. S34.1** The main results of standard luteolin(CAS 491-70-3,  $C_{15}H_{10}O_6$ )and its corresponding peak in the TIC diagram using UPLC-Q-Orbitrap-MS analysis. (A) The MS/MS fragments of standard luteolin. (B) The MS/MS spectra from chromatographic peak in the Naodeshengpian extract.

**Note:** The  $m/z$  values in purple are the calculated ones. The  $m/z$  calculation was based on the relative atomic masses of C (12.0000), H (1.007825), O (15.994915), and N (14.003074)<sup>[1]</sup>.

**Identification:** As seen in Fig. S34.1, the R.T. value, molecular ion peak, MS/MS spectra, and characteristic pears were highly similar. Thus, the chromatographic peak in the Naodeshengpian extract was identified as luteolin(CAS 491-70-3,  $C_{15}H_{10}O_6$ ).

Suppl. 35 Identification of genistein CAS 446-72-0

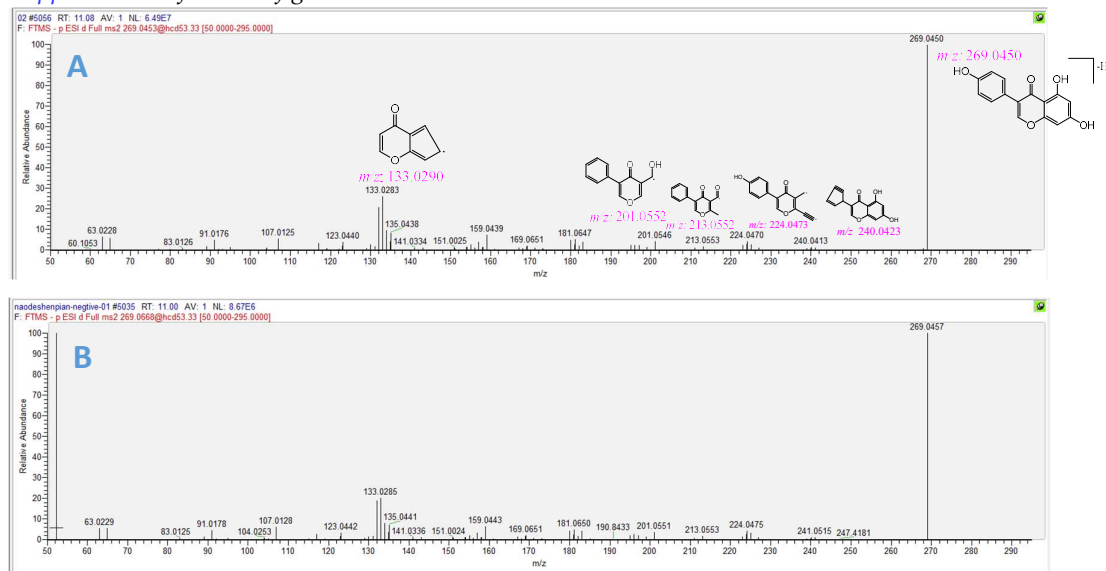

**Fig. S35.1** The main results of standard genistein(CAS 446-72-0,  $C_{15}H_{10}O_5$ )and its corresponding peak in the TIC diagram using UPLC-Q-Orbitrap-MS analysis. **(A)** The MS/MS fragments of standard genistein. **(B)** The MS/MS spectra from chromatographic peak in the Naodeshengpian extract.

**Note:** The  $m/z$  values in purple are the calculated ones. The  $m/z$  calculation was based on the relative atomic masses of C (12.0000), H (1.007825), O (15.994915), and N (14.003074)<sup>[1]</sup>.

**Identification:** As seen in Fig. S35.1, the R.T. value, molecular ion peak, MS/MS spectra, and characteristic pears were highly similar. Thus, the chromatographic peak in the Naodeshengpian extract was identified as genistein(CAS 446-72-0,  $C_{15}H_{10}O_5$ ).

Suppl. 36 Identification of notoginsenoside R1 CAS 80418-24-2

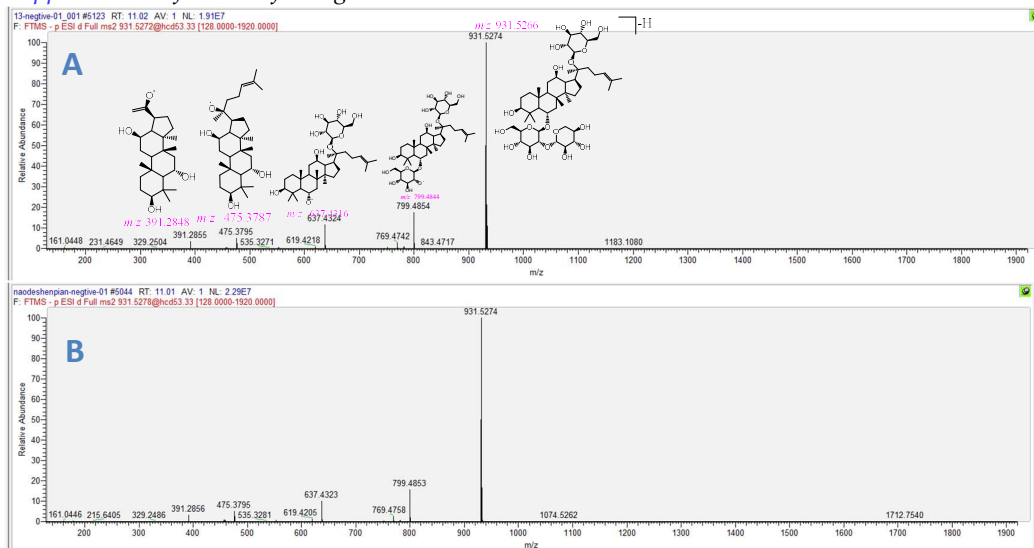

**Fig. S36.1** The main results of standard notoginsenoside R1(CAS 80418-24-2,  $C_{47}H_{80}O_{18}$ )and its corresponding peak in the TIC diagram using UPLC-Q-Orbitrap-MS analysis. **(A)** The MS/MS fragments of standard notoginsenoside R1. **(B)** The MS/MS spectra from chromatographic peak in the Naodeshengpian extract.

**Note:** The  $m/z$  values in purple are the calculated ones. The  $m/z$  calculation was based on the relative atomic masses of C (12.0000), H (1.007825), O (15.994915), and N (14.003074)<sup>[1]</sup>.

**Identification:** As seen in Fig. S36.1, the R.T. value, molecular ion peak, MS/MS spectra, and characteristic pears were highly similar. Thus, the chromatographic peak in the Naodeshengpian extract was identified as notoginsenoside R1(CAS 80418-24-2,  $C_{47}H_{80}O_{18}$ ).



Suppl. 37 Identification of pratensein CAS 2284-31-3

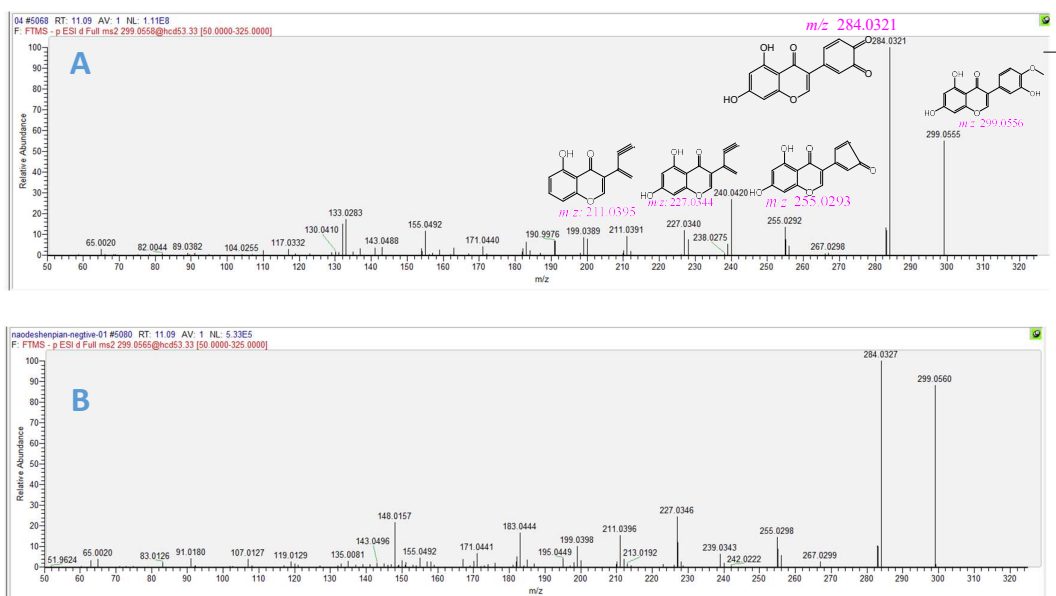

**Fig. S37.1** The main results of standard pratensein(CAS 2284-31-3,  $C_{16}H_{12}O_6$ )and its corresponding peak in the TIC diagram using UPLC-Q-Orbitrap-MS analysis. **(A)** The MS/MS fragments of standard pratensein. **(B)** The MS/MS spectra from chromatographic peak in the Naodeshengpian extract.

**Note:** The  $m/z$  values in purple are the calculated ones. The  $m/z$  calculation was based on the relative atomic masses of C (12.0000), H (1.007825), O (15.994915), and N (14.003074)<sup>[1]</sup>.

**Identification:** As seen in Fig. S37.1, the R.T. value, molecular ion peak, MS/MS spectra, and characteristic pears were highly similar. Thus, the chromatographic peak in the Naodeshengpian extract was identified as pratensein(CAS 2284-31-3,  $C_{16}H_{12}O_6$ ).

Suppl. 38 Identification of diosmetin CAS 520-34-3

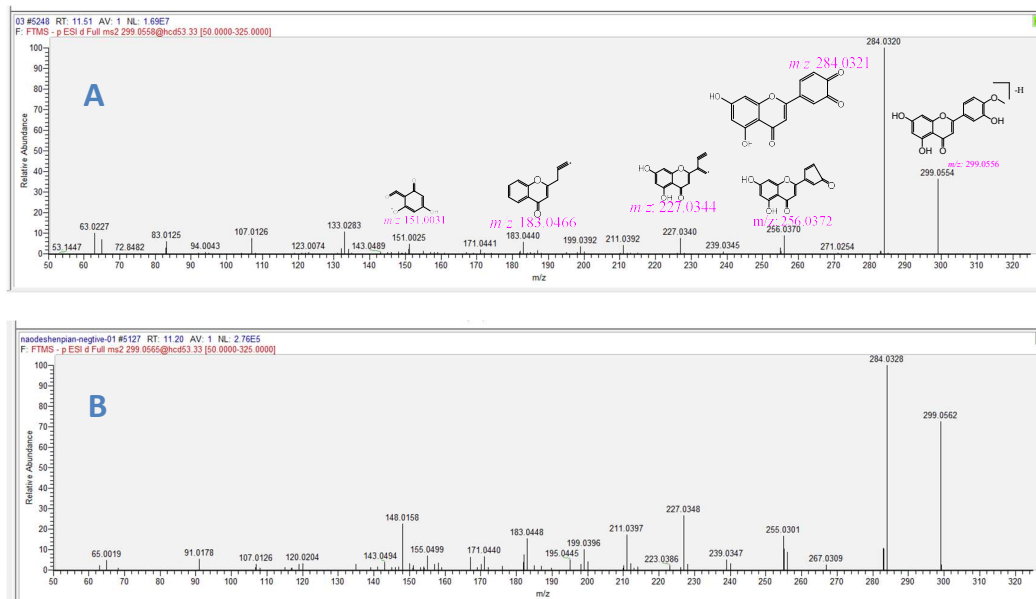

**Fig. S38.1** The main results of standard diosmetin(CAS 520-34-3,  $C_{16}H_{12}O_6$ )and its corresponding peak in the TIC diagram using UPLC-Q-Orbitrap-MS analysis. **(A)** The MS/MS fragments of standard diosmetin. **(B)** The MS/MS spectra from chromatographic peak in the Naodeshengpian extract.

**Note:** The  $m/z$  values in purple are the calculated ones. The  $m/z$  calculation was based on the relative atomic masses of C (12.0000), H (1.007825), O (15.994915), and N (14.003074)<sup>[1]</sup>.

**Identification:** As seen in Fig. S38.1, the R.T. value, molecular ion peak, MS/MS spectra, and characteristic pears were highly similar. Thus, the chromatographic peak in the Naodeshengpian extract was identified as diosmetin(CAS 520-34-3,  $C_{16}H_{12}O_6$ ).

Suppl. 39 Identification of ginsenoside Rg1 CAS 22427-39-0

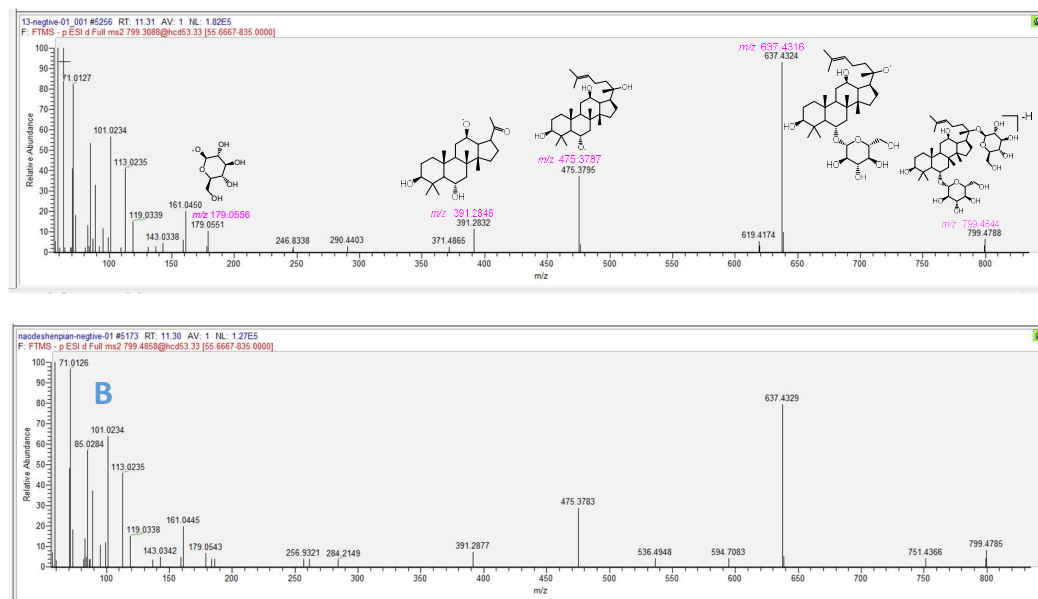

**Fig. S39.1** The main results of standard ginsenoside Rg1(CAS 22427-39-0,  $C_{42}H_{72}O_{14}$ ) and its corresponding peak in the TIC diagram using UPLC-Q-Orbitrap-MS analysis. **(A)** The MS/MS fragments of standard ginsenoside Rg1. **(B)** The MS/MS spectra from chromatographic peak in the Naodeshengpian extract.

**Note:** The  $m/z$  values in purple are the calculated ones. The  $m/z$  calculation was based on the relative atomic masses of C (12.0000), H (1.007825), O (15.994915), and N (14.003074)<sup>[1]</sup>.

**Identification:** As seen in Fig. S39.1, the R.T. value, molecular ion peak, MS/MS spectra, and characteristic peaks were highly similar. Thus, the chromatographic peak in the Naodeshengpian extract was identified as ginsenoside Rg1(CAS 22427-39-0,  $C_{42}H_{72}O_{14}$ ).

Suppl. 40 Identification of apigenin CAS 520-36-5

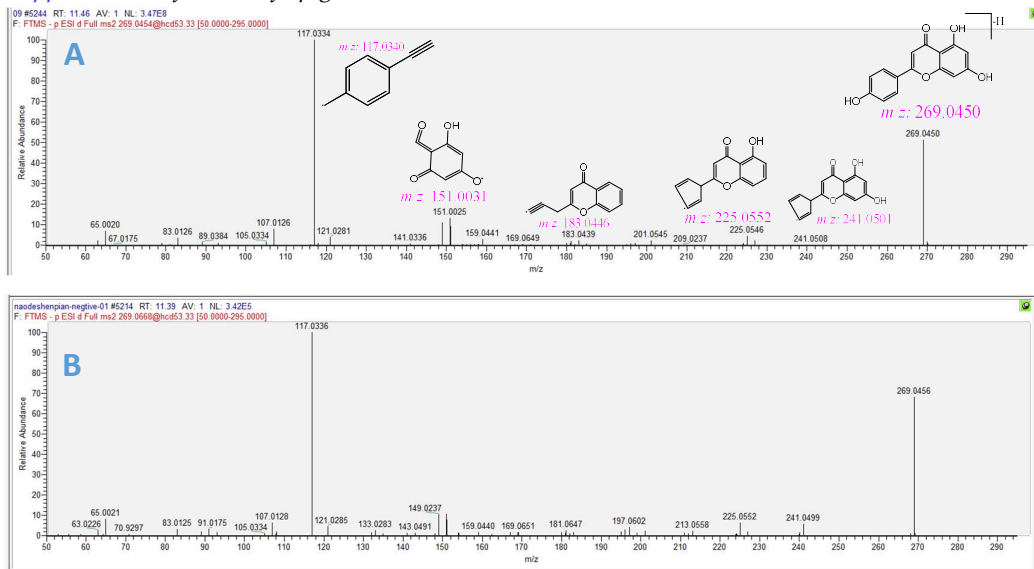

**Fig. S40.1** The main results of standard apigenin(CAS 520-36-5, C<sub>15</sub>H<sub>10</sub>O<sub>5</sub>)and its corresponding peak in the TIC diagram using UPLC-Q-Orbitrap-MS analysis. **(A)** The MS/MS fragments of standard apigenin. **(B)** The MS/MS spectra from chromatographic peak in the Naodeshengpian extract.

**Note:** The *m/z* values in purple are the calculated ones. The *m/z* calculation was based on the relative atomic masses of C (12.0000), H (1.007825), O (15.994915), and N (14.003074)<sup>[1]</sup>.

**Identification:** As seen in Fig. S40.1, the R.T. value, molecular ion peak, MS/MS spectra, and characteristic pears were highly similar. Thus, the chromatographic peak in the Naodeshengpian extract was identified as apigenin(CAS 520-36-5, C<sub>15</sub>H<sub>10</sub>O<sub>5</sub>).

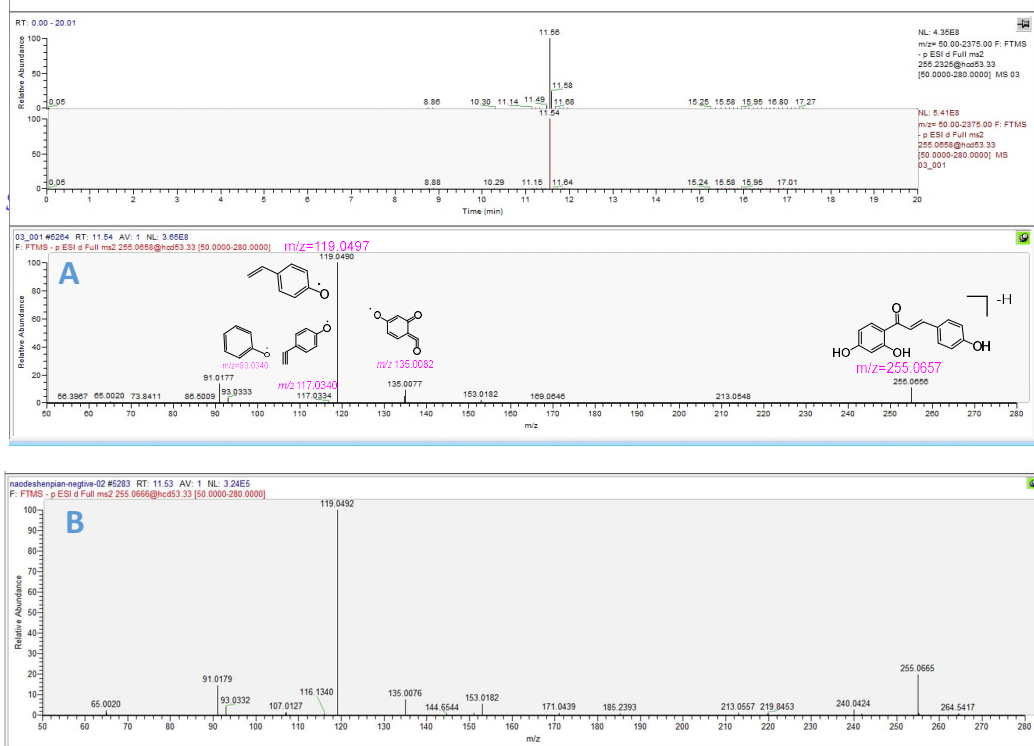

**Fig. S41.1** The main results of standard isoliquiritigenin(CAS 961-29-5,  $C_{15}H_{12}O_4$ )and its corresponding peak in the TIC diagram using UPLC-Q-Orbitrap-MS analysis. **(A)** The MS/MS fragments of standard isoliquiritigenin. **(B)** The MS/MS spectra from chromatographic peak in the Naodeshengpian extract.

**Note:** The  $m/z$  values in purple are the calculated ones. The  $m/z$  calculation was based on the relative atomic masses of C (12.0000), H (1.007825), O (15.994915), and N (14.003074)<sup>[1]</sup>.

**Identification:** As seen in Fig. S41.1, the R.T. value, molecular ion peak, MS/MS spectra, and characteristic pears were highly similar. Thus, the chromatographic peak in the Naodeshengpian extract was identified as isoliquiritigenin(CAS 961-29-5,  $C_{15}H_{12}O_4$ ).

Suppl. 42 Identification of 7-methoxy-4'-hydroxyisoflavone CAS 486-63-5

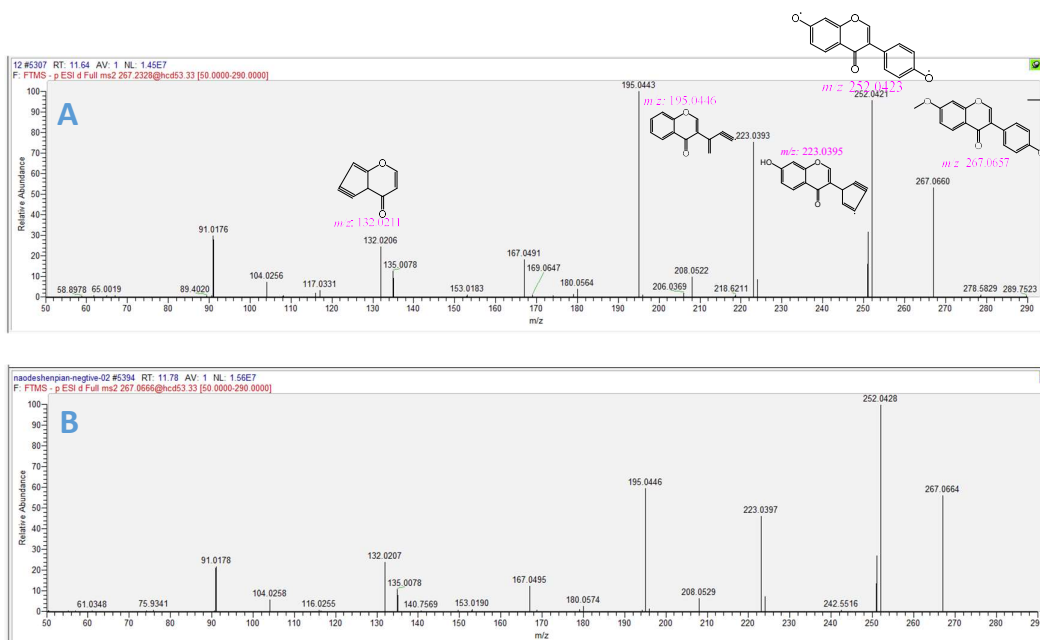

**Fig. S42.1** The main results of standard 7-methoxy-4'-hydroxyisoflavone(CAS 961-29-5, C<sub>16</sub>H<sub>12</sub>O<sub>4</sub>)and its corresponding peak in the TIC diagram using UPLC-Q-Orbitrap-MS analysis. **(A)** The MS/MS fragments of standard 7-methoxy-4'-hydroxyisoflavone. **(B)** The MS/MS spectra from chromatographic peak in the Naodeshengpian extract.

**Note:** The  $m/z$  values in purple are the calculated ones. The  $m/z$  calculation was based on the relative atomic masses of C (12.0000), H (1.007825), O (15.994915), and N (14.003074)<sup>[1]</sup>.

**Identification:** As seen in Fig. S42.1, the R.T. value, molecular ion peak, MS/MS spectra, and characteristic pears were highly similar. Thus, the chromatographic peak in the Naodeshengpian extract was identified as 7-methoxy-4'-hydroxyisoflavone(CAS 961-29-5, C<sub>16</sub>H<sub>12</sub>O<sub>4</sub>).

Suppl. 43 Identification of kaempferol CAS 520-18-3

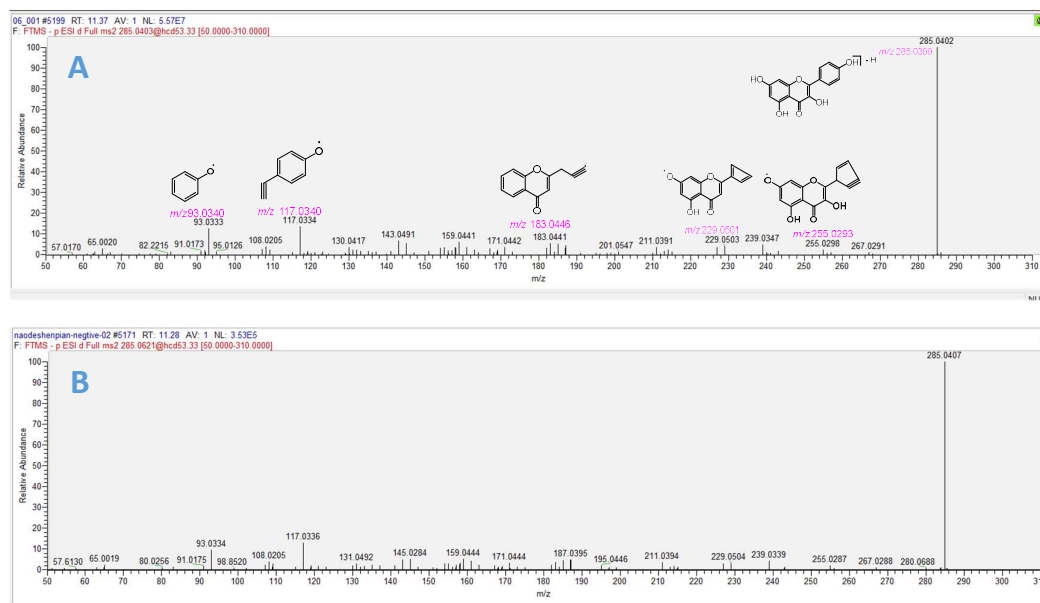

**Fig. S43.1** The main results of standard kaempferol(CAS 520-18-3,  $C_{15}H_{10}O_6$ )and its corresponding peak in the TIC diagram using UPLC-Q-Orbitrap-MS analysis. **(A)** The MS/MS fragments of standard kaempferol. **(B)** The MS/MS spectra from chromatographic peak in the Naodeshengpian extract.

**Note:** The  $m/z$  values in purple are the calculated ones. The  $m/z$  calculation was based on the relative atomic masses of C (12.0000), H (1.007825), O (15.994915), and N (14.003074)<sup>[1]</sup>.

**Identification:** As seen in Fig. S43.1, the R.T. value, molecular ion peak, MS/MS spectra, and characteristic pears were highly similar. Thus, the chromatographic peak in the Naodeshengpian extract was identified as kaempferol(CAS 520-18-3,  $C_{15}H_{10}O_6$ ).

Suppl. 44 Identification of formononetin CAS 485-72-3

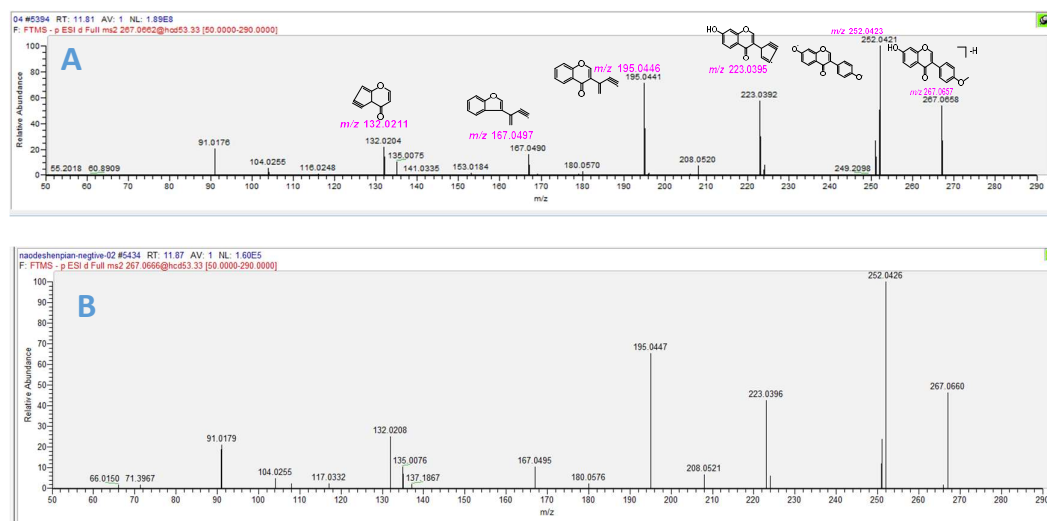

**Fig. S44.1** The main results of standard formononetin(CAS 485-72-3,  $C_{16}H_{12}O_4$ )and its corresponding peak in the TIC diagram using UPLC-Q-Orbitrap-MS analysis. **(A)** The MS/MS fragments of standard formononetin. **(B)** The MS/MS spectra from chromatographic peak in the Naodeshengpian extract.

**Note:** The  $m/z$  values in purple are the calculated ones. The  $m/z$  calculation was based on the relative atomic masses of C (12.0000), H (1.007825), O (15.994915), and N (14.003074)<sup>[1]</sup>.

**Identification:** As seen in Fig. S44.1, the R.T. value, molecular ion peak, MS/MS spectra, and characteristic pears were highly similar. Thus, the chromatographic peak in the Naodeshengpian extract was identified as formononetin(CAS 485-72-3,  $C_{16}H_{12}O_4$ ).



Suppl. 45 Identification of ginsenoside Rf CAS 52286-58-5

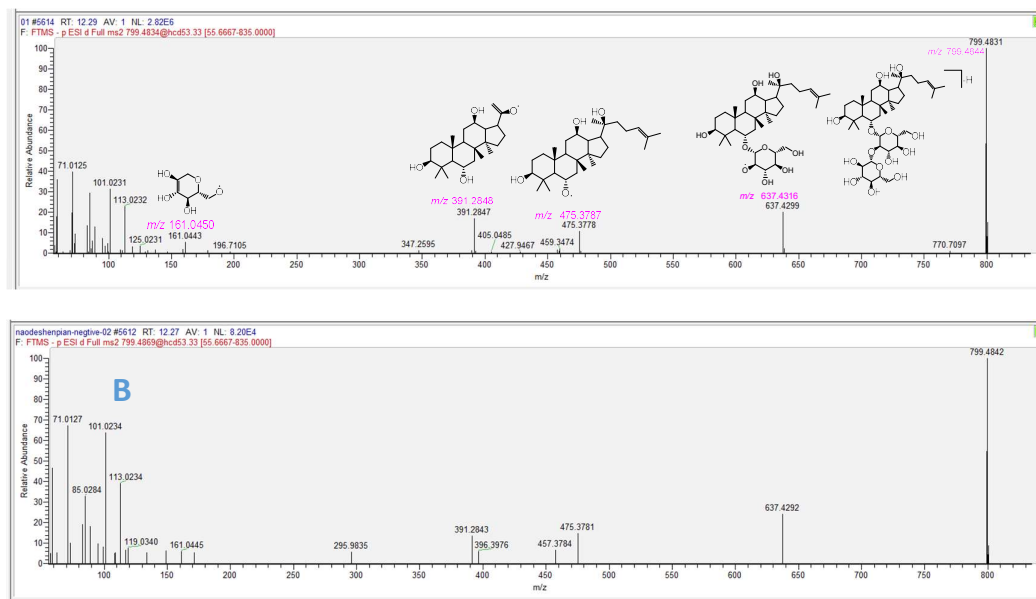

**Fig. S45.1** The main results of standard ginsenoside Rf (CAS 52286-58-5,  $C_{42}H_{72}O_{14}$ ) and its corresponding peak in the TIC diagram using UPLC-Q-Orbitrap-MS analysis. **(A)** The MS/MS fragments of standard ginsenoside Rf. **(B)** The MS/MS spectra from chromatographic peak in the Naodeshengpian extract.

**Note:** The  $m/z$  values in purple are the calculated ones. The  $m/z$  calculation was based on the relative atomic masses of C (12.0000), H (1.007825), O (15.994915), and N (14.003074)<sup>[1]</sup>.

**Identification:** As seen in Fig. S45.1, the R.T. value, molecular ion peak, MS/MS spectra, and characteristic peaks were highly similar. Thus, the chromatographic peak in the Naodeshengpian extract was identified as ginsenoside Rf (CAS 52286-58-5,  $C_{42}H_{72}O_{14}$ ).

**Suppl. 46** Identification of (r)notoginsenoside R2 CAS 948046-15-9

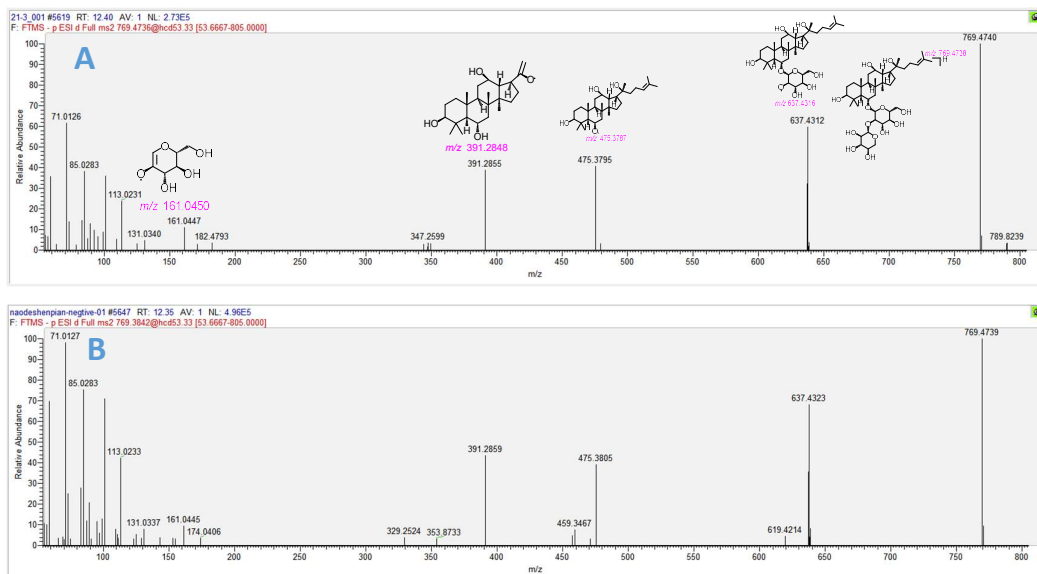

**Fig. S46.1** The main results of standard (r)notoginsenoside R2 (CAS 948046-15-9, C<sub>41</sub>H<sub>70</sub>O<sub>13</sub>) and its corresponding peak in the TIC diagram using UPLC-Q-Orbitrap-MS analysis. **(A)** The MS/MS fragments of standard (r)notoginsenoside R2. **(B)** The MS/MS spectra from chromatographic peak in the Naodeshengpian extract.

**Note:** The  $m/z$  values in purple are the calculated ones. The  $m/z$  calculation was based on the relative atomic masses of C (12.0000), H (1.007825), O (15.994915), and N (14.003074)<sup>[1]</sup>.

**Identification:** As seen in Fig. S46.1, the R.T. value, molecular ion peak, MS/MS spectra, and characteristic pears were highly similar. Thus, the chromatographic peak in the Naodeshengpian extract was identified as (r)notoginsenoside R2(CAS 948046-15-9, C<sub>41</sub>H<sub>70</sub>O<sub>13</sub>).

Suppl. 47 Identification of prunetin CAS 552-59-0

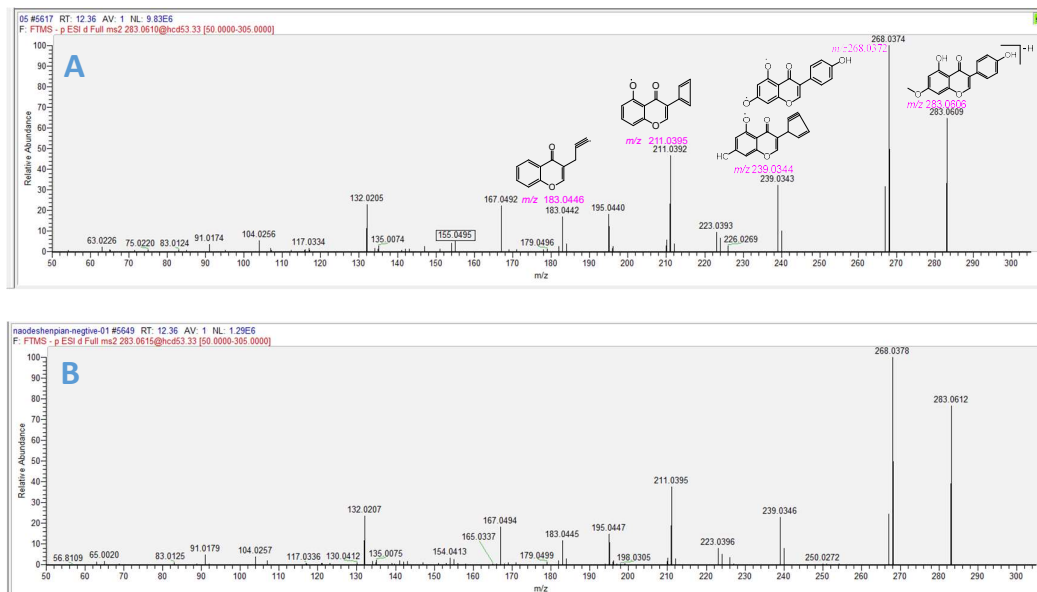

**Fig. S47.1** The main results of standard prunetin (CAS 552-59-0,  $C_{16}H_{12}O_5$ ) and its corresponding peak in the TIC diagram using UPLC-Q-Orbitrap-MS analysis. **(A)** The MS/MS fragments of standard prunetin. **(B)** The MS/MS spectra from chromatographic peak in the Naodeshengpian extract.

**Note:** The  $m/z$  values in purple are the calculated ones. The  $m/z$  calculation was based on the relative atomic masses of C (12.0000), H (1.007825), O (15.994915), and N (14.003074)<sup>[1]</sup>.

**Identification:** As seen in Fig. S47.1, the R.T. value, molecular ion peak, MS/MS spectra, and characteristic peaks were highly similar. Thus, the chromatographic peak in the Naodeshengpian extract was identified as prunetin (CAS 552-59-0,  $C_{16}H_{12}O_5$ ).

Suppl. 48 Identification of ginsenoside Rg2 CAS 52286-74-5

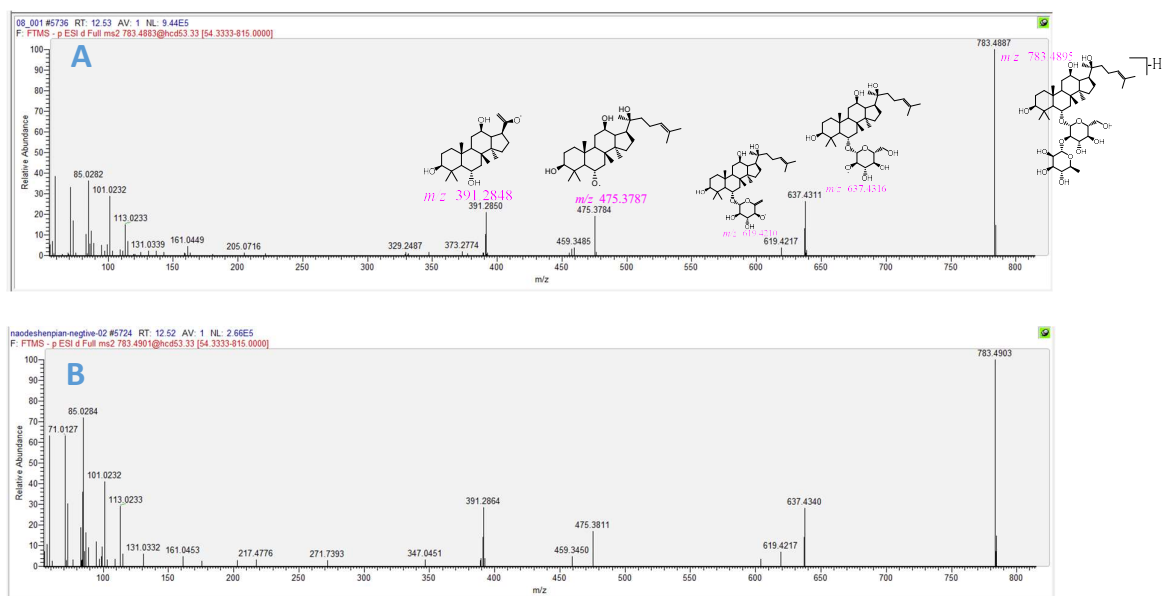

**Fig. S48.1** The main results of standard ginsenoside Rg2 (CAS 52286-74-5,  $C_{42}H_{72}O_{13}$ ) and its corresponding peak in the TIC diagram using UPLC-Q-Orbitrap-MS analysis. **(A)** The MS/MS fragments of standard ginsenoside Rg2. **(B)** The MS/MS spectra from chromatographic peak in the Naodeshengpian extract.

**Note:** The  $m/z$  values in purple are the calculated ones. The  $m/z$  calculation was based on the relative atomic masses of C (12.0000), H (1.007825), O (15.994915), and N (14.003074)<sup>[1]</sup>.

**Identification:** As seen in Fig. S48.1, the R.T. value, molecular ion peak, MS/MS spectra, and characteristic peaks were highly similar. Thus, the chromatographic peak in the Naodeshengpian extract was identified as ginsenoside Rg2 (CAS 52286-74-5,  $C_{42}H_{72}O_{13}$ ).

Suppl. 49 Identification of 20S-ginsenoside Rh1 CAS 63223-86-9

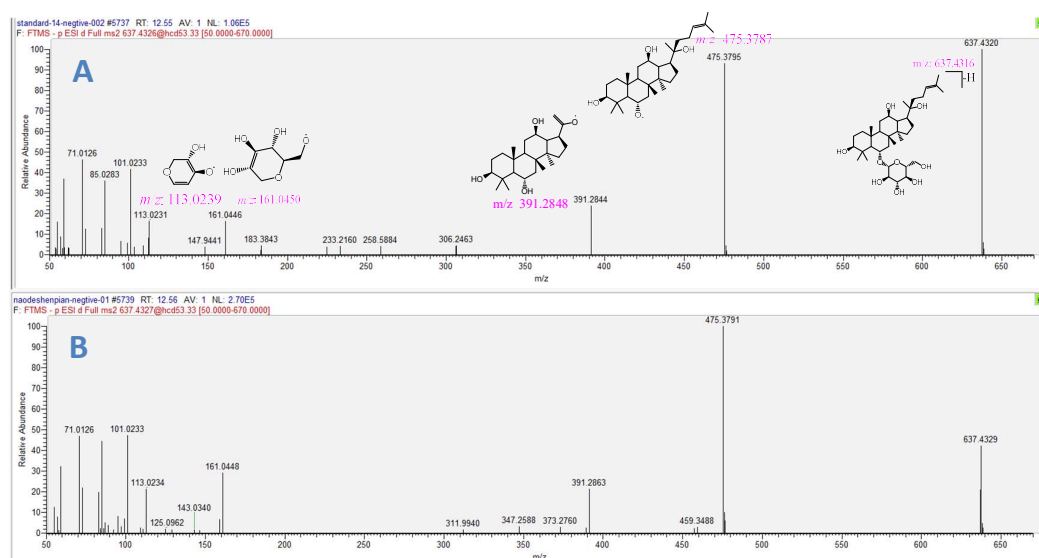

**Fig. S49.1** The main results of standard 20S-ginsenoside Rh1 (CAS 63223-86-9,  $C_{36}H_{62}O_9$ ) and its corresponding peak in the TIC diagram using UPLC-Q-Orbitrap-MS analysis. (A) The MS/MS fragments of standard 20S-ginsenoside Rh1. (B) The MS/MS spectra from chromatographic peak in the Naodeshengpian extract.

**Note:** The  $m/z$  values in purple are the calculated ones. The  $m/z$  calculation was based on the relative atomic masses of C (12.0000), H (1.007825), O (15.994915), and N (14.003074)<sup>[1]</sup>.

**Identification:** As seen in Fig. S49.1, the R.T. value, molecular ion peak, MS/MS spectra, and characteristic peaks were highly similar. Thus, the chromatographic peak in the Naodeshengpian extract was identified as 20S-ginsenoside Rh1 (CAS 63223-86-9,  $C_{36}H_{62}O_9$ ).

**Suppl. 50 Identification of ginsenoside Rb1 CAS 41753-43-9**

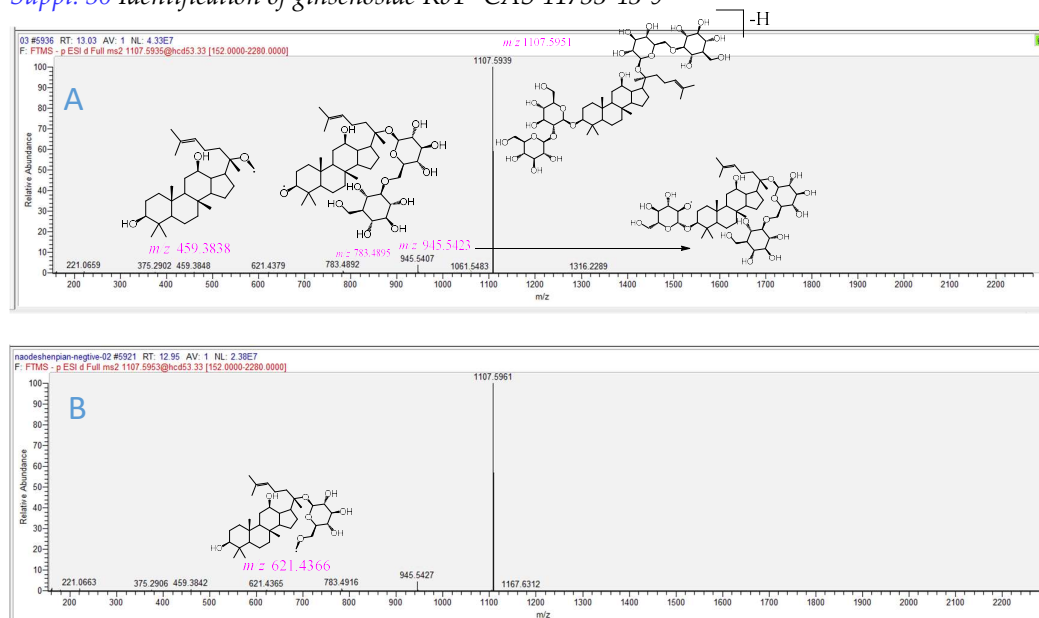

**Fig. S50.1** The main results of standard ginsenoside Rb1 (CAS 41753-43-9,  $C_{54}H_{92}O_{63}$ ) and its corresponding peak in the TIC diagram using UPLC-Q-Orbitrap-MS analysis. **(A)** The MS/MS fragments of standard ginsenoside Rb1. **(B)** The MS/MS spectra from chromatographic peak in the Naodeshengpian extract.

**Note:** The  $m/z$  values in purple are the calculated ones. The  $m/z$  calculation was based on the relative atomic masses of C (12.0000), H (1.007825), O (15.994915), and N (14.003074)<sup>[1]</sup>.

**Identification:** As seen in [Fig. S50.1](#), the R.T. value, molecular ion peak, MS/MS spectra, and characteristic pears were highly similar. Thus, the chromatographic peak in the Naodeshengpian extract was identified as ginsenoside Rb1 (CAS 41753-43-9,  $C_{54}H_{92}O_{63}$ ).

Suppl. 51 Identification of 8-prenyldaidzein CAS 135384-00-8

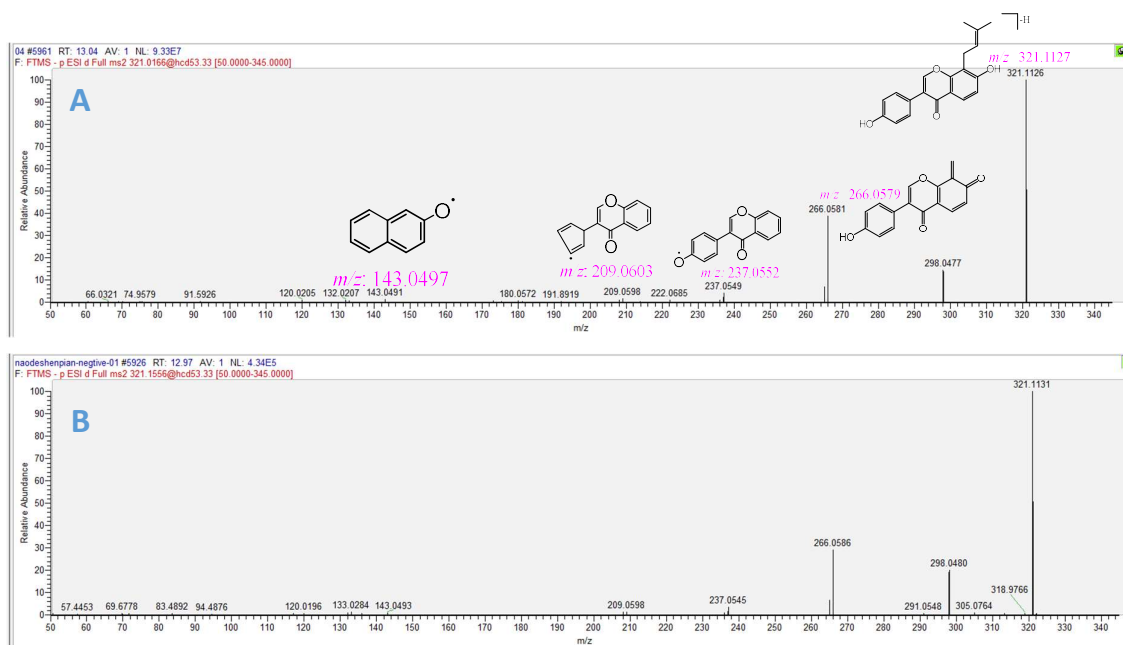

**Fig. S51.1** The main results of standard 8-prenyldaidzein (CAS 135384-00-8,  $C_{20}H_{18}O_4$ ) and its corresponding peak in the TIC diagram using UPLC-Q-Orbitrap-MS analysis. **(A)** The MS/MS fragments of standard 8-prenyldaidzein. **(B)** The MS/MS spectra from chromatographic peak in the Naodeshengpian extract.

**Note:** The  $m/z$  values in purple are the calculated ones. The  $m/z$  calculation was based on the relative atomic masses of C (12.0000), H (1.007825), O (15.994915), and N (14.003074)<sup>[1]</sup>.

**Identification:** As seen in Fig. S51.1, the R.T. value, molecular ion peak, MS/MS spectra, and characteristic peaks were highly similar. Thus, the chromatographic peak in the Naodeshengpian extract was identified as 8-prenyldaidzein (CAS 135384-00-8,  $C_{20}H_{18}O_4$ ).

Suppl. 52 Identification of ginsenoside Rd CAS 52705-93-8

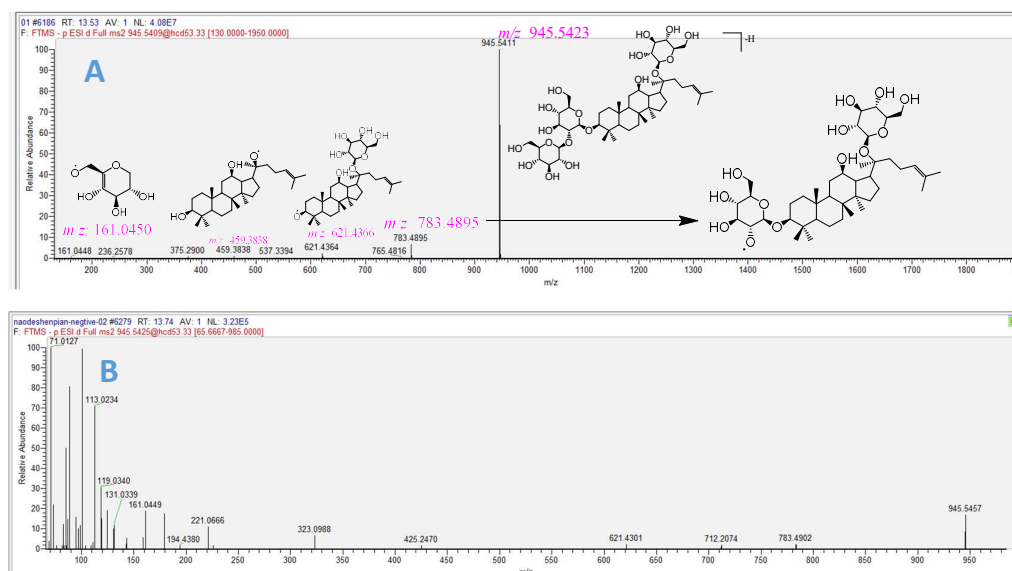

**Fig. S52.1** The main results of standard ginsenoside Rd (CAS 52705-93-8,  $C_{48}H_{82}O_{18}$ ) and its corresponding peak in the TIC diagram using UPLC-Q-Orbitrap-MS analysis. **(A)** The MS/MS fragments of standard ginsenoside Rd. **(B)** The MS/MS spectra from chromatographic peak in the Naodeshengpian extract.

**Note:** The  $m/z$  values in purple are the calculated ones. The  $m/z$  calculation was based on the relative atomic masses of C (12.0000), H (1.007825), O (15.994915), and N (14.003074)<sup>[1]</sup>.

**Identification:** As seen in Fig. S52.1, the R.T. value, molecular ion peak, MS/MS spectra, and characteristic peaks were highly similar. Thus, the chromatographic peak in the Naodeshengpian extract was identified as ginsenoside Rd (CAS 52705-93-8,  $C_{48}H_{82}O_{18}$ ).



*Suppl. 53 Identification of ginsenoside Rg3 CAS 14197-60-5*

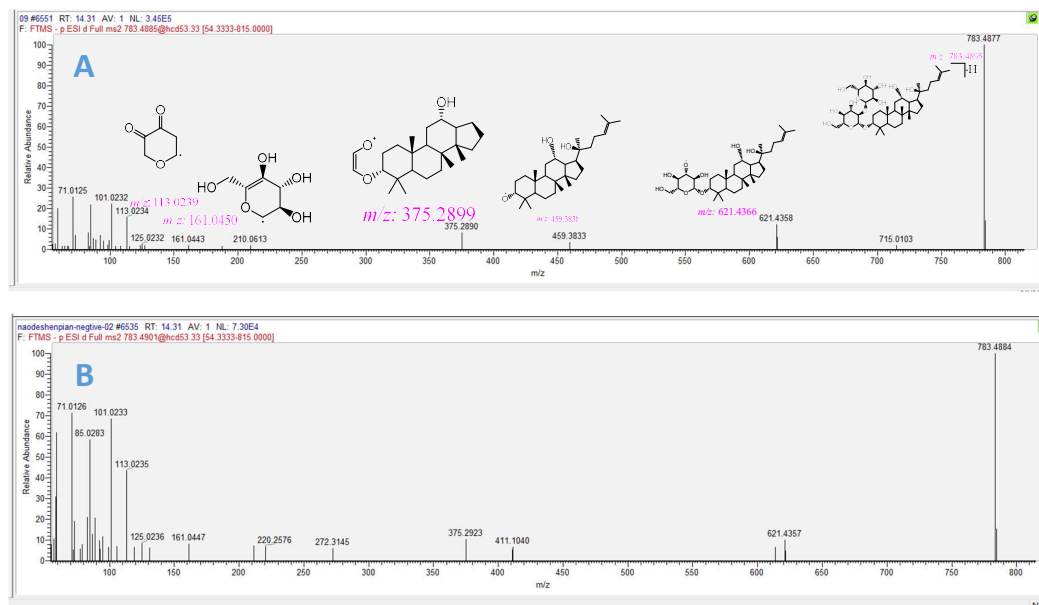

**Fig. S53.1** The main results of standard ginsenoside Rg3 (CAS 14197-60-5,  $C_{42}H_{72}O_{13}$ ) and its corresponding peak in the TIC diagram using UPLC-Q-Orbitrap-MS analysis. **(A)** The MS/MS fragments of standard ginsenoside Rg3. **(B)** The MS/MS spectra from chromatographic peak in the Naodeshengpian extract.

**Note:** The  $m/z$  values in purple are the calculated ones. The  $m/z$  calculation was based on the relative atomic masses of C (12.0000), H (1.007825), O (15.994915), and N (14.003074)<sup>[1]</sup>.

**Identification:** As seen in Fig. S53.1, the R.T. value, molecular ion peak, MS/MS spectra, and characteristic peaks were highly similar. Thus, the chromatographic peak in the Naodeshengpian extract was identified as ginsenoside Rg3 (CAS 14197-60-5,  $C_{42}H_{72}O_{13}$ ).

Suppl. 54 Identification of ethyl stearate CAS 111-61-5

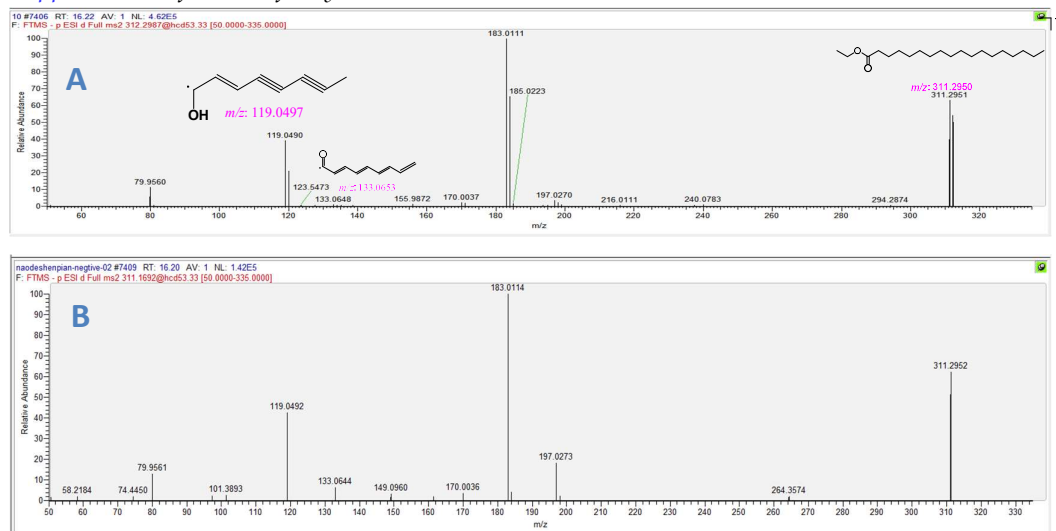

**Fig. S54.1** The main results of standard ethyl stearate(CAS 111-61-5,  $C_{20}H_{40}O_2$ )and its corresponding peak in the TIC diagram using UPLC-Q-Orbitrap-MS analysis. **(A)** The MS/MS fragments of standard ethyl stearate. **(B)** The MS/MS spectra from chromatographic peak in the Naodeshengpian extract.

**Note:** The  $m/z$  values in purple are the calculated ones. The  $m/z$  calculation was based on the relative atomic masses of C (12.0000), H (1.007825), O (15.994915), and N (14.003074)<sup>[1]</sup>.

**Identification:** As seen in Fig. S54.1, the R.T. value, molecular ion peak, MS/MS spectra, and characteristic peaks were highly similar. Thus, the chromatographic peak in the Naodeshengpian extract was identified as ethyl stearate(CAS 111-61-5,  $C_{20}H_{40}O_2$ ).

Suppl. 55 Identification of matrine CAS 519-02-8

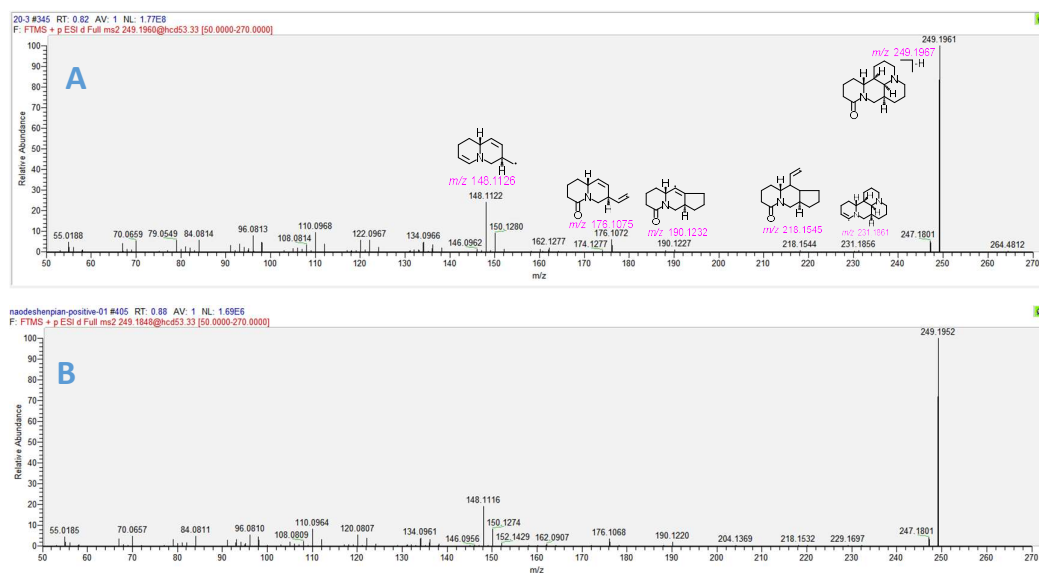

**Fig. S55.1** The main results of standard matrine(CAS 519-02-8,  $C_{15}H_{24}N_2O$ )and its corresponding peak in the TIC diagram using UPLC-Q-Orbitrap-MS analysis. (A) The MS/MS fragments of standard matrine. (B) The MS/MS spectra from chromatographic peak in the Naodeshengpian extract.

**Note:** The  $m/z$  values in purple are the calculated ones. The  $m/z$  calculation was based on the relative atomic masses of C (12.0000), H (1.007825), O (15.994915), and N (14.003074)<sup>[1]</sup>.

**Identification:** As seen in Fig. S55.1, the R.T. value, molecular ion peak, MS/MS spectra, and characteristic pears were highly similar. Thus, the chromatographic peak in the Naodeshengpian extract was identified as matrine(CAS 519-02-8,  $C_{15}H_{24}N_2O$ ).

Suppl. S6 Identification of 5-hydroxymethylfurfural CAS 67-47-0

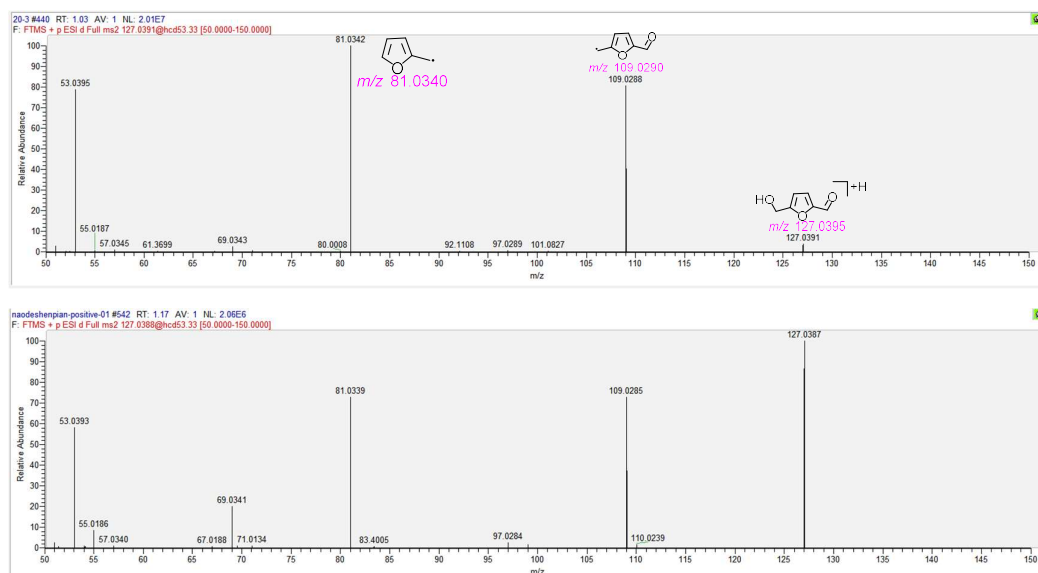

**Fig. S56.1** The main results of standard 5-hydroxymethylfurfural(CAS 67-47-0, C<sub>6</sub>H<sub>6</sub>O<sub>3</sub>)and its corresponding peak in the TIC diagram using UPLC-Q-Orbitrap-MS analysis. **(A)** The MS/MS fragments of standard 5-hydroxymethylfurfural. **(B)** The MS/MS spectra from chromatographic peak in the Naodeshengpian extract.

**Note:** The  $m/z$  values in purple are the calculated ones. The  $m/z$  calculation was based on the relative atomic masses of C (12.0000), H (1.007825), O (15.994915), and N (14.003074)<sup>[1]</sup>.

**Identification:** As seen in Fig. S56.1, the R.T. value, molecular ion peak, MS/MS spectra, and characteristic pears were highly similar. Thus, the chromatographic peak in the Naodeshengpian extract was identified as 5-hydroxymethylfurfural(CAS 67-47-0, C<sub>6</sub>H<sub>6</sub>O<sub>3</sub>).

Suppl. 57 Identification of caffeine CAS 58-08-2

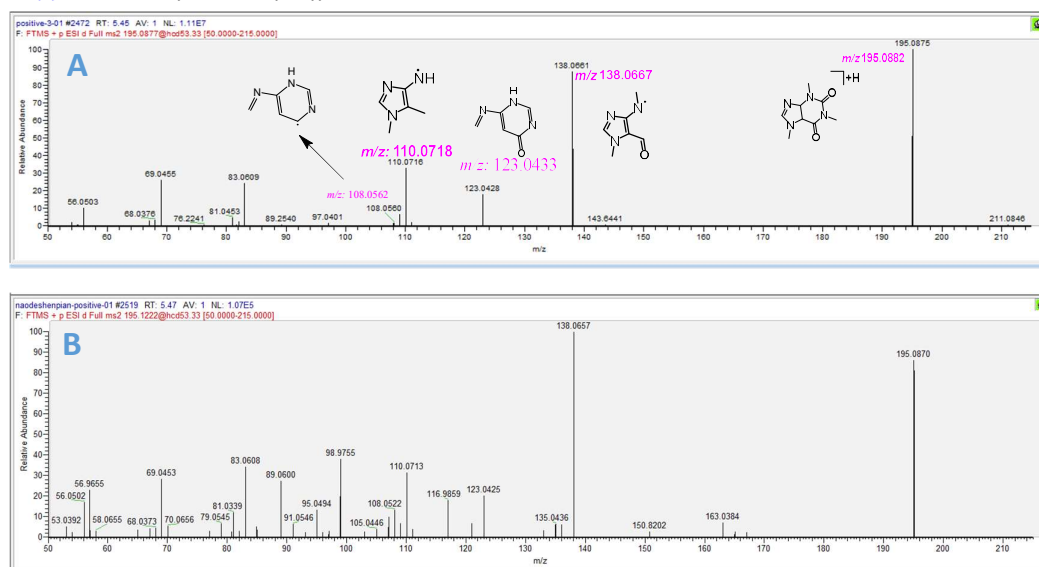

**Fig. S57.1** The main results of standard caffeine(CAS 58-08-2,  $C_8H_{10}N_4O_2$ )and its corresponding peak in the TIC diagram using UPLC-Q-Orbitrap-MS analysis. (A) The MS/MS fragments of standard caffeine. (B) The MS/MS spectra from chromatographic peak in the Naodeshengpian extract.

**Note:** The  $m/z$  values in purple are the calculated ones. The  $m/z$  calculation was based on the relative atomic masses of C (12.0000), H (1.007825), O (15.994915), and N (14.003074)<sup>[1]</sup>.

**Identification:** As seen in Fig. S57.1, the R.T. value, molecular ion peak, MS/MS spectra, and characteristic pears were highly similar. Thus, the chromatographic peak in the Naodeshengpian extract was identified as caffeine(CAS 58-08-2,  $C_8H_{10}N_4O_2$ ).

*Suppl. 58 Identification of 1,5-dicaffeoylquinic acid CAS 30964-13-7*

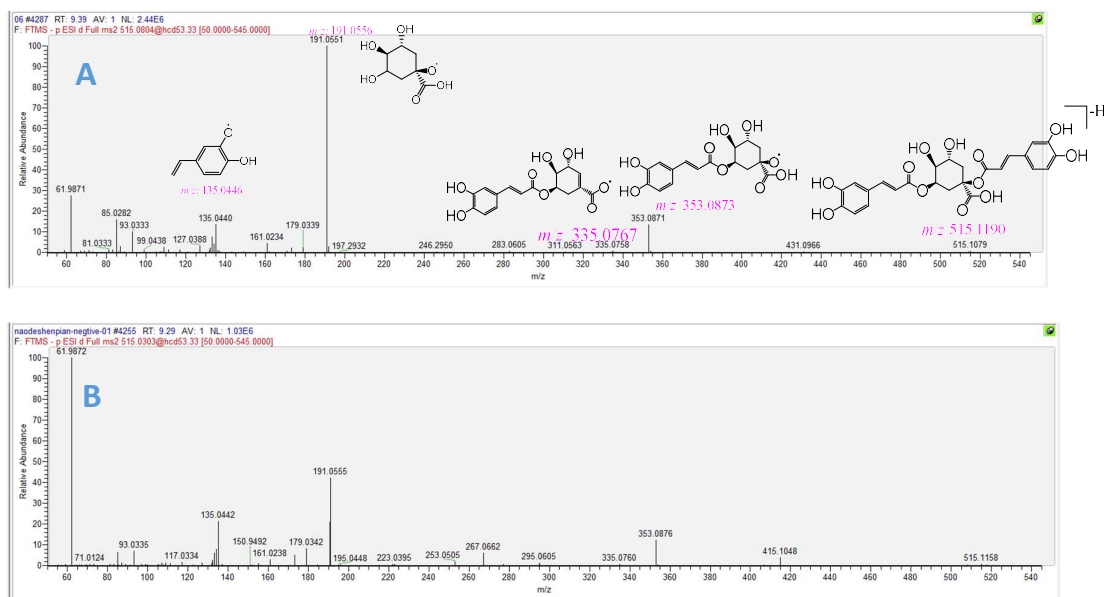

**Fig. S58.1** The main results of standard 1,5-dicaffeoylquinic acid(CAS 30964-13-7,  $C_{25}H_{24}O_{12}$ )and its corresponding peak in the TIC diagram using UPLC-Q-Orbitrap-MS analysis. **(A)** The MS/MS fragments of standard 1,5-dicaffeoylquinic acid. **(B)** The MS/MS spectra from chromatographic peak in the Naodeshengpian extract.

**Note:** The  $m/z$  values in purple are the calculated ones. The  $m/z$  calculation was based on the relative atomic masses of C (12.0000), H (1.007825), O (15.994915), and N (14.003074)<sup>[1]</sup>.

**Identification:** As seen in Fig. S58.1, the R.T. value, molecular ion peak, MS/MS spectra, and characteristic pears were highly similar. Thus, the chromatographic peak in the Naodeshengpian extract was identified as 1,5-dicaffeoylquinic acid(CAS 30964-13-7,  $C_{25}H_{24}O_{12}$ ).

Suppl. 59 Identification of scoparone CAS 120-08-1

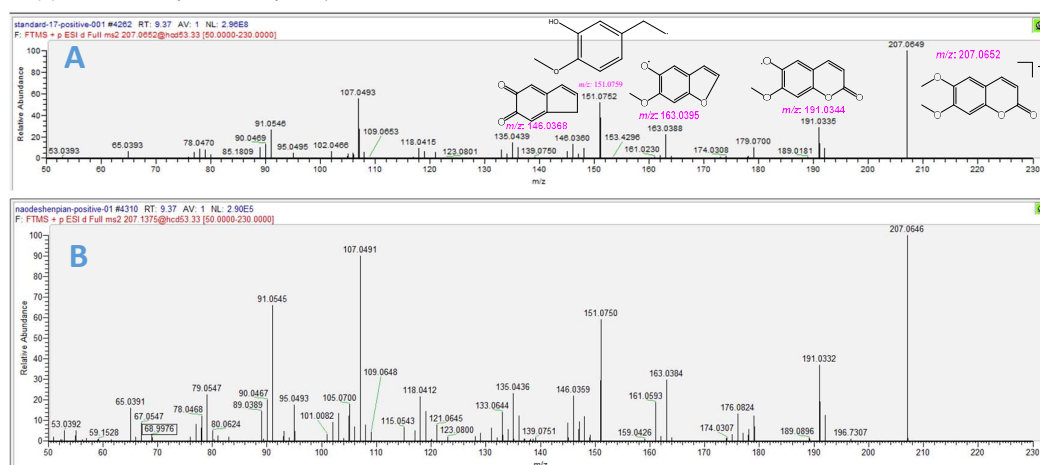

**Fig. S59.1** The main results of standard scoparone(CAS 120-08-1,  $C_{11}H_{10}O_4$ )and its corresponding peak in the TIC diagram using UPLC-Q-Orbitrap-MS analysis. **(A)** The MS/MS fragments of standard scoparone. **(B)** The MS/MS spectra from chromatographic peak in the Naodeshengpian extract.

**Note:** The  $m/z$  values in purple are the calculated ones. The  $m/z$  calculation was based on the relative atomic masses of C (12.0000), H (1.007825), O (15.994915), and N (14.003074)<sup>[1]</sup>.

**Identification:** As seen in Fig. S59.1, the R.T. value, molecular ion peak, MS/MS spectra, and characteristic pears were highly similar. Thus, the chromatographic peak in the Naodeshengpian extract was identified as scoparone(CAS 120-08-1,  $C_{11}H_{10}O_4$ ).

Suppl. 60 Identification of senkyunolide A CAS 63038-10-8

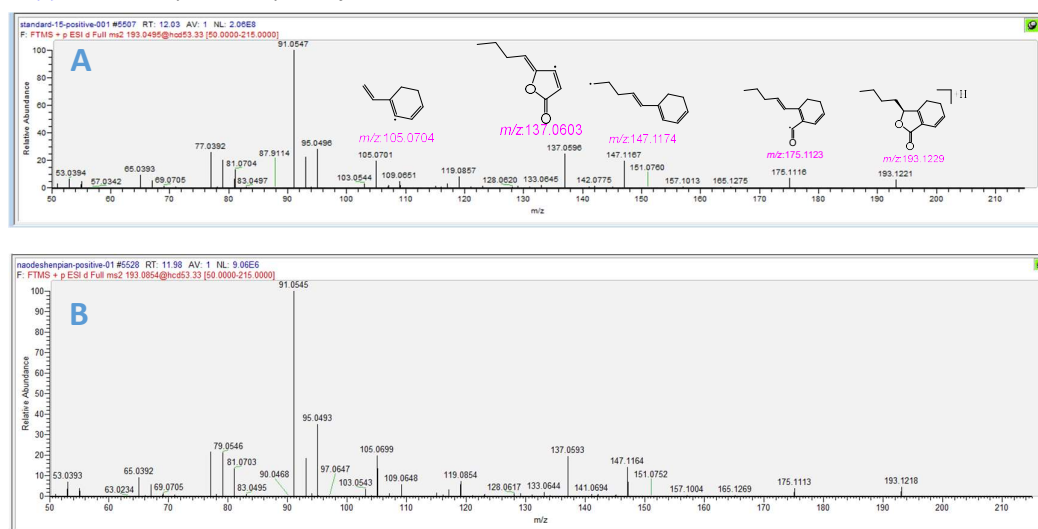

**Fig. S60.1** The main results of standard senkyunolide A(CAS 63038-10-8,  $C_{12}H_{16}O_2$ ) and its corresponding peak in the TIC diagram using UPLC-Q-Orbitrap-MS analysis. **(A)** The MS/MS fragments of standard senkyunolide A. **(B)** The MS/MS spectra from chromatographic peak in the Naodeshengpian extract.

**Note:** The  $m/z$  values in purple are the calculated ones. The  $m/z$  calculation was based on the relative atomic masses of C (12.0000), H (1.007825), O (15.994915), and N (14.003074)<sup>[1]</sup>.

**Identification:** As seen in Fig. S60.1, the R.T. value, molecular ion peak, MS/MS spectra, and characteristic peaks were highly similar. Thus, the chromatographic peak in the Naodeshengpian extract was identified as senkyunolide A(CAS 63038-10-8,  $C_{12}H_{16}O_2$ ).



Suppl. 61 Identification of ligustilide CAS 81944-09-4

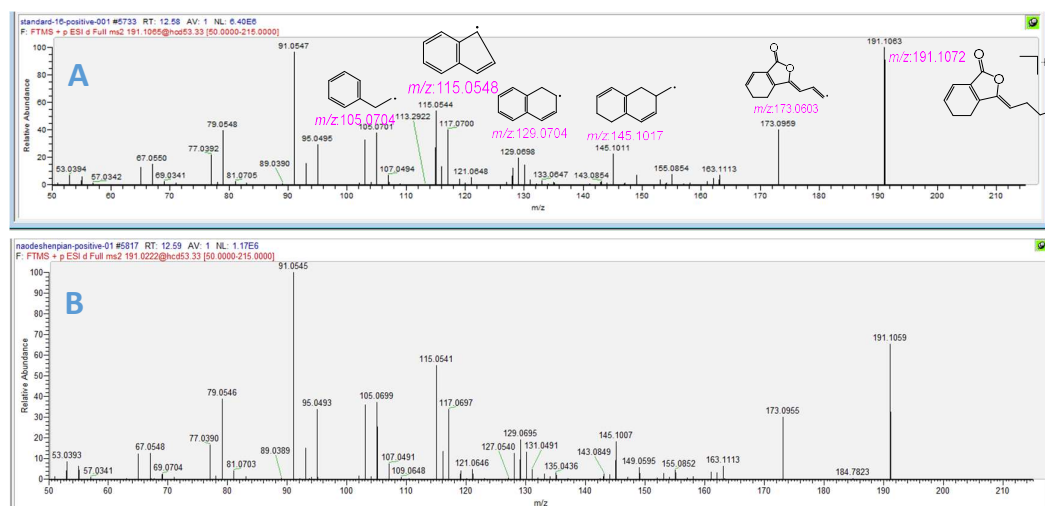

**Fig. S61.1** The main results of standard ligustilide(CAS 81944-09-4,  $C_{12}H_{14}O_2$ )and its corresponding peak in the TIC diagram using UPLC-Q-Orbitrap-MS analysis. **(A)** The MS/MS fragments of standard ligustilide. **(B)** The MS/MS spectra from chromatographic peak in the Naodeshengpian extract.

**Note:** The  $m/z$  values in purple are the calculated ones. The  $m/z$  calculation was based on the relative atomic masses of C (12.0000), H (1.007825), O (15.994915), and N (14.003074)<sup>[1]</sup>.

**Identification:** As seen in Fig. S61.1, the R.T. value, molecular ion peak, MS/MS spectra, and characteristic pears were highly similar. Thus, the chromatographic peak in the Naodeshengpian extract was identified as ligustilide(CAS 81944-09-4,  $C_{12}H_{14}O_2$ ).

Suppl. 62 Identification of 3,3',4',5,6,7,8-heptamethoxyflavone CAS 1178-24-1

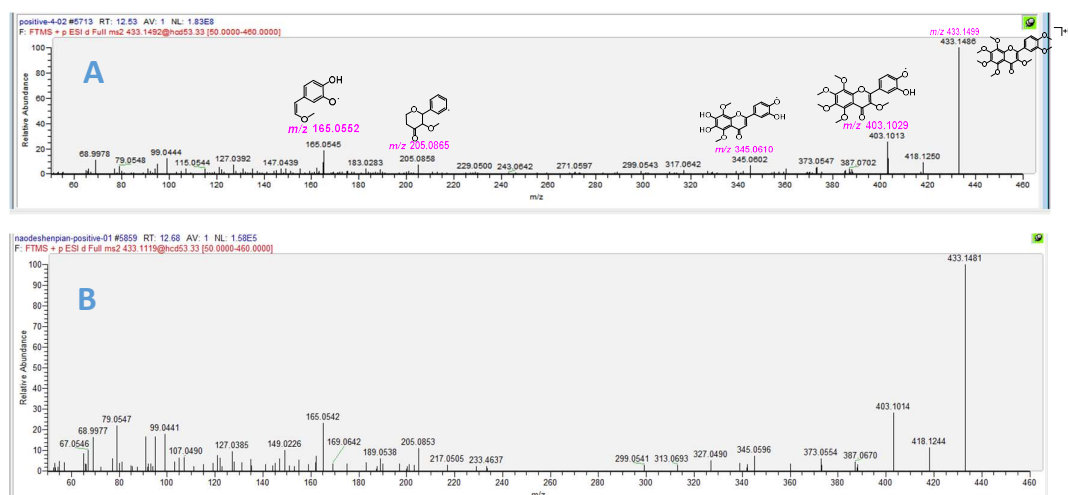

**Fig. S62.1** The main results of standard 3,3',4',5,6,7,8-heptamethoxyflavone(CAS 1178-24-1,  $C_{22}H_{24}O_9$ )and its corresponding peak in the TIC diagram using UPLC-Q-Orbitrap-MS analysis. **(A)** The MS/MS fragments of standard 3,3',4',5,6,7,8-heptamethoxyflavone. **(B)** The MS/MS spectra from chromatographic peak in the Naodeshengpian extract.

**Note:** The  $m/z$  values in purple are the calculated ones. The  $m/z$  calculation was based on the relative atomic masses of C (12.0000), H (1.007825), O (15.994915), and N (14.003074)<sup>[1]</sup>.

**Identification:** As seen in Fig. S62.1, the R.T. value, molecular ion peak, MS/MS spectra, and characteristic pears were highly similar. Thus, the chromatographic peak in the Naodeshengpian extract was identified as 3,3',4',5,6,7,8-heptamethoxyflavone(CAS 1178-24-1,  $C_{22}H_{24}O_9$ ).

Suppl. 63 Identification of tangeretin CAS 481-53-8

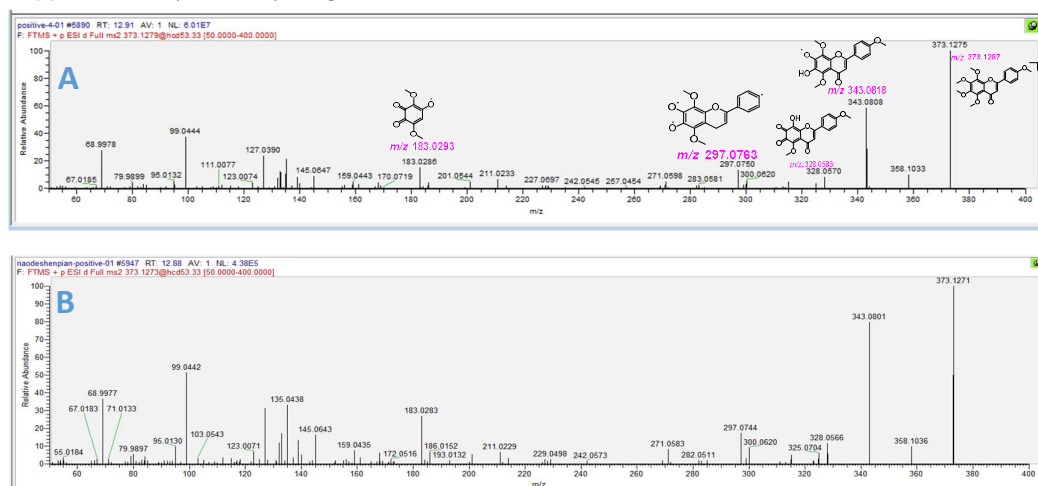

**Fig. S63.1** The main results of standard tangeretin(CAS 481-53-8,  $C_{20}H_{20}O_7$ )and its corresponding peak in the TIC diagram using UPLC-Q-Orbitrap-MS analysis. **(A)** The MS/MS fragments of standard tangeretin. **(B)** The MS/MS spectra from chromatographic peak in the Naodeshengpian extract.

**Note:** The  $m/z$  values in purple are the calculated ones. The  $m/z$  calculation was based on the relative atomic masses of C (12.0000), H (1.007825), O (15.994915), and N (14.003074)<sup>[1]</sup>.

**Identification:** As seen in Fig. S63.1, the R.T. value, molecular ion peak, MS/MS spectra, and characteristic pears were highly similar. Thus, the chromatographic peak in the Naodeshengpian extract was identified as tangeretin(CAS 481-53-8,  $C_{20}H_{20}O_7$ ).

Suppl. 64 Identification of 5-hydroxyflavone CAS 491-78-1

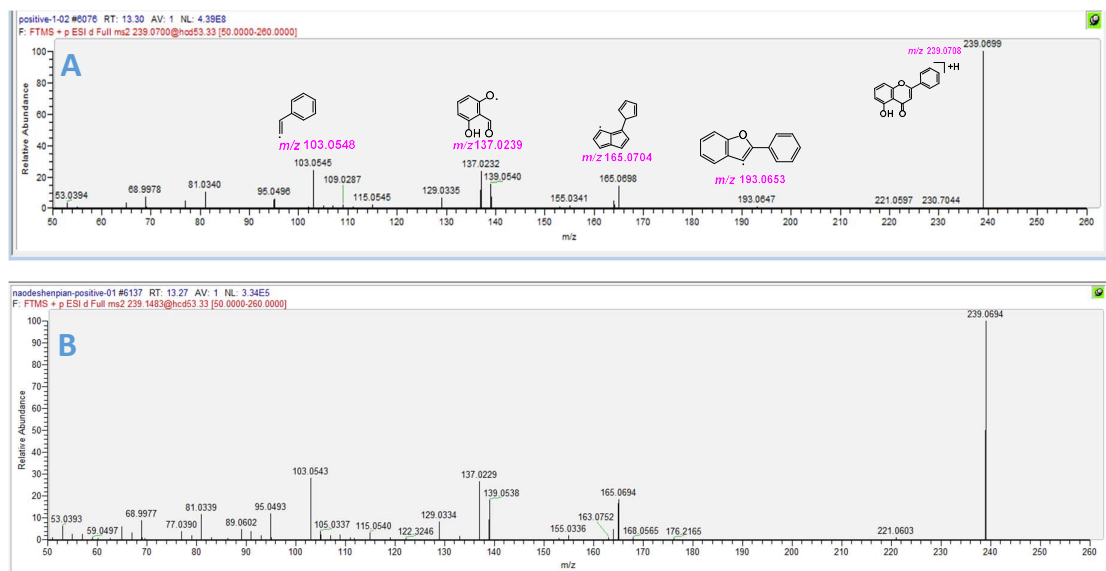

**Fig. S64.1** The main results of standard 5-hydroxyflavone(CAS 491-78-1,  $C_{15}H_{10}O_3$ )and its corresponding peak in the TIC diagram using UPLC-Q-Orbitrap-MS analysis. (A) The MS/MS fragments of standard 5-hydroxyflavone. (B) The MS/MS spectra from chromatographic peak in the Naodeshengpian extract.

**Note:** The  $m/z$  values in purple are the calculated ones. The  $m/z$  calculation was based on the relative atomic masses of C (12.0000), H (1.007825), O (15.994915), and N (14.003074)<sup>[1]</sup>.

**Identification:** As seen in Fig. S64.1, the R.T. value, molecular ion peak, MS/MS spectra, and characteristic pears were highly similar. Thus, the chromatographic peak in the Naodeshengpian extract was identified as 5-hydroxyflavone(CAS 491-78-1,  $C_{15}H_{10}O_3$ ).

Suppl. 65 Identification of levistilide A CAS 88182-33-6

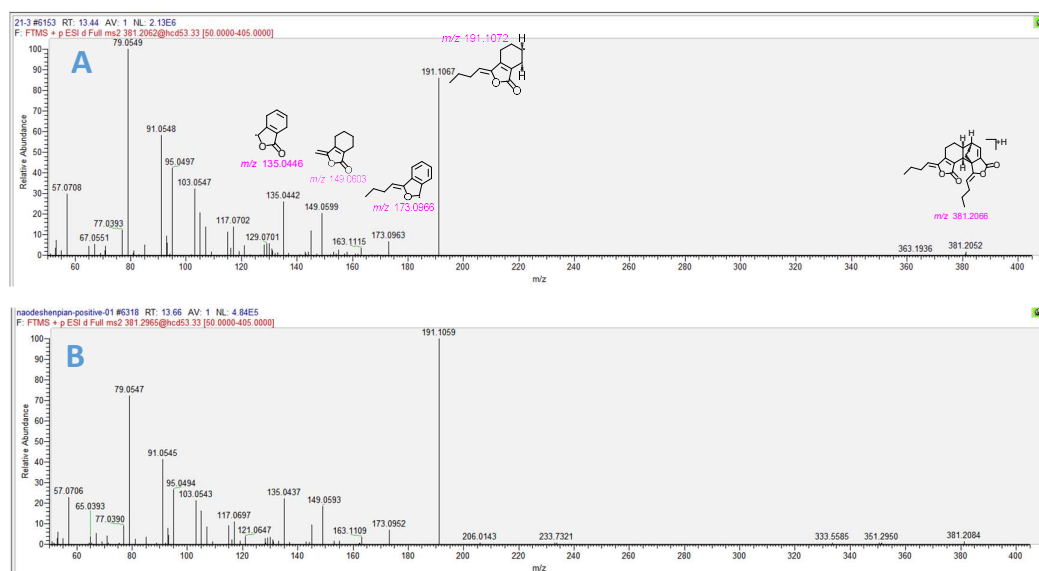

**Fig. S65.1** The main results of standard levistilide A(CAS 88182-33-6, C<sub>24</sub>H<sub>28</sub>O<sub>4</sub>)and its corresponding peak in the TIC diagram using UPLC-Q-Orbitrap-MS analysis. **(A)** The MS/MS fragments of standard levistilide A. **(B)** The MS/MS spectra from chromatographic peak in the Naodeshengpian extract.

**Note:** The *m/z* values in purple are the calculated ones. The *m/z* calculation was based on the relative atomic masses of C (12.0000), H (1.007825), O (15.994915), and N (14.003074)<sup>[1]</sup>.

**Identification:** As seen in Fig. S65.1, the R.T. value, molecular ion peak, MS/MS spectra, and characteristic pears were highly similar. Thus, the chromatographic peak in the Naodeshengpian extract was identified as levistilide A(CAS 88182-33-6, C<sub>24</sub>H<sub>28</sub>O<sub>4</sub>).

Suppl. 66 Identification of diosgenin CAS 512-04-9

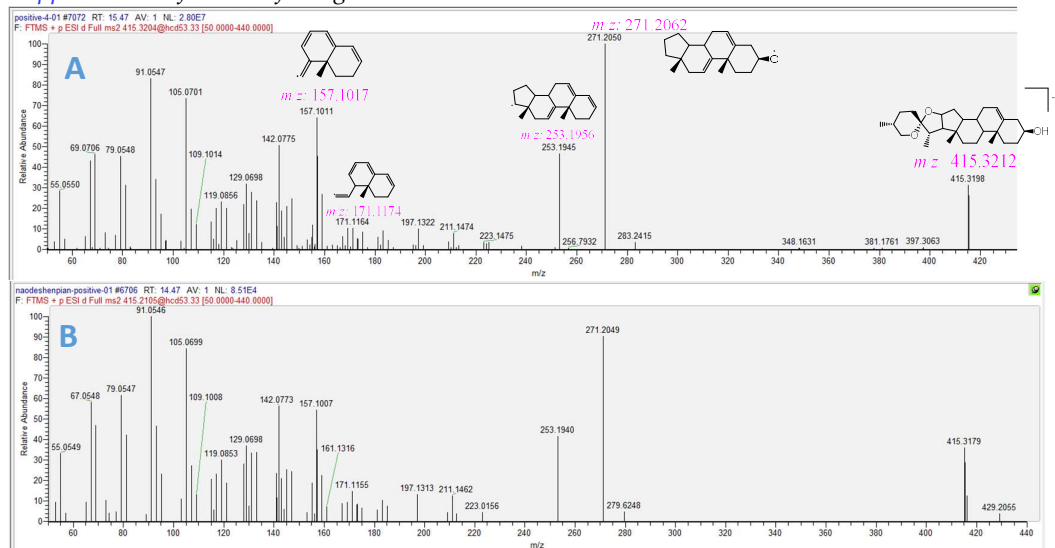

**Fig. S66.1** The main results of standard diosgenin(CAS 512-04-9,  $C_{27}H_{42}O_3$ )and its corresponding peak in the TIC diagram using UPLC-Q-Orbitrap-MS analysis. **(A)** The MS/MS fragments of standard diosgenin. **(B)** The MS/MS spectra from chromatographic peak in the Naodeshengpian extract.

**Note:** The  $m/z$  values in purple are the calculated ones. The  $m/z$  calculation was based on the relative atomic masses of C (12.0000), H (1.007825), O (15.994915), and N (14.003074)<sup>[1]</sup>.

**Identification:** As seen in Fig. S66.1, the R.T. value, molecular ion peak, MS/MS spectra, and characteristic pears were highly similar. Thus, the chromatographic peak in the Naodeshengpian extract was identified as diosgenin(CAS 512-04-9,  $C_{27}H_{42}O_3$ ).

Suppl. 67 Identification of chloesteryl acetate CAS 604-35-3

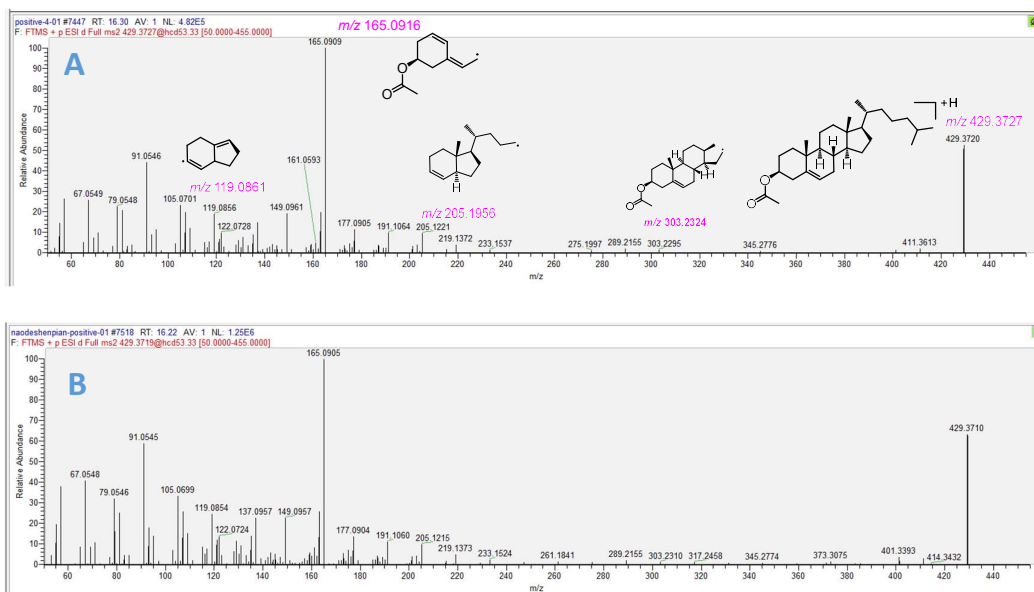

**Fig. S67.1** The main results of standard chloesteryl acetate(CAS 604-35-3,  $C_{29}H_{48}O_2$ )and its corresponding peak in the TIC diagram using UPLC-Q-Orbitrap-MS analysis. **(A)** The MS/MS fragments of standard chloesteryl acetate. **(B)** The MS/MS spectra from chromatographic peak in the Naodeshengpian extract.

**Note:** The  $m/z$  values in purple are the calculated ones. The  $m/z$  calculation was based on the relative atomic masses of C (12.0000), H (1.007825), O (15.994915), and N (14.003074)<sup>[1]</sup>.

**Identification:** As seen in Fig. S67.1, the R.T. value, molecular ion peak, MS/MS spectra, and characteristic pears were highly similar. Thus, the chromatographic peak in the Naodeshengpian extract was identified as chloesteryl acetate(CAS 604-35-3,  $C_{29}H_{48}O_2$ ).

Suppl. 68 Identification of (+)-4-cholesten-3-one CAS 601-57-0

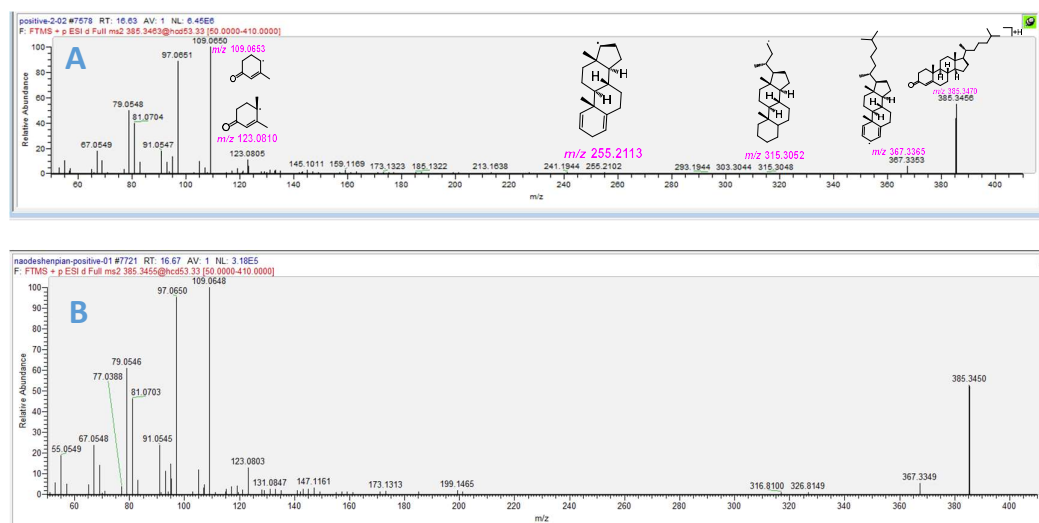

**Fig. S68.1** The main results of standard (+)-4-cholesten-3-one(CAS 601-57-0, C<sub>27</sub>H<sub>44</sub>O)and its corresponding peak in the TIC diagram using UPLC-Q-Orbitrap-MS analysis. **(A)** The MS/MS fragments of standard (+)-4-cholesten-3-one. **(B)** The MS/MS spectra from chromatographic peak in the Naodeshengpian extract.

**Note:** The *m/z* values in purple are the calculated ones. The *m/z* calculation was based on the relative atomic masses of C (12.0000), H (1.007825), O (15.994915), and N (14.003074)<sup>[1]</sup>.

**Identification:** As seen in Fig. S68.1, the R.T. value, molecular ion peak, MS/MS spectra, and characteristic pears were highly similar. Thus, the chromatographic peak in the Naodeshengpian extract was identified as (+)-4-cholesten-3-one(CAS 601-57-0, C<sub>27</sub>H<sub>44</sub>O).

**Table s69.** Relevant information on Semi-quantification of five Q-markers.

| Q-marker                | Regression equation               | Linear range $\mu\text{g}$ | R      | Area Mean $\pm$ SD (n=3)           | Semi-quantification n (% , Mean $\pm$ SD, n=3) |
|-------------------------|-----------------------------------|----------------------------|--------|------------------------------------|------------------------------------------------|
| puerarin (12)           | $y=29558661458.00x+28629582.52$   | 0.003—0.09                 | 0.9906 | 27797149904.83 $\pm$ 4685068214.04 | 1.044 $\pm$ 0.176                              |
| notoginsenoside R1 (36) | $y=1785224130.15x$                | 0.000—0.09                 | 0.9971 | 204957784.96 $\pm$ 10284503.43     | 0.128 $\pm$ 0.001                              |
| HSYA (7)                | $y=8198235744.27x-6664626.92$     | 0.003—0.09                 | 0.9994 | 279555302.82 $\pm$ 17560673.84     | 0.039 $\pm$ 0.002                              |
| levistilide A (65)      | $y=115338307380.79x-571258466.24$ | 0.003—0.09                 | 0.9992 | 6665965805.48 $\pm$ 52682,021.52   | 0.070 $\pm$ 0.006                              |
| citric acid (2)         | $y=19328804671.30x-84165248.88$   | 0.003—0.09                 | 0.9984 | 14240900956.59 $\pm$ 359376499.50  | 0.822 $\pm$ 0.021                              |



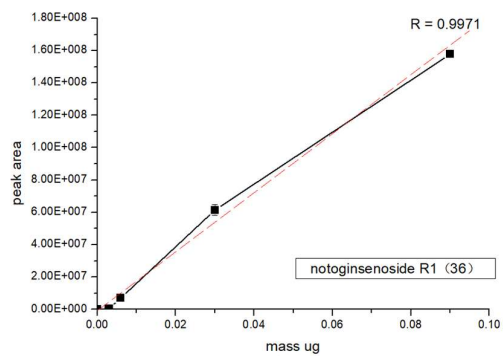

**Fig. s69** A typical linear regression curve (taking notoginsenoside R1 as the example)

Note: Inject samples were at five concentrations, i.e., 0, 1.0, 2.0, 10.0, 30.0  $\mu\text{g/mL}$ , which corresponds to 0.000, 0.003, 0.006, 0.03, and 0.09  $\mu\text{g}$ . The injection volume was 3  $\mu\text{L}$ .

## Reference

[1] J.H., G., *Mass spectrometry*. 2013, Beijing: Science press.
